# Supplementary material
Source: ML conference proceedings conference paper supplement (https://proceedings.neurips.cc/paper_files/paper/2025/hash/3cb18c3c31ff1b77b97f4512abd5e4a6-Abstract.html)
Supplement: Supplementary file 1 [file NeurIPS_2025_ocean_cr_0124.pdf › NeurIPS_2025_ocean_cr_0124.pdf]

---

# NUTS: Eddy-Robust Reconstruction of Surface Ocean Nutrients via Two-Scale Modeling

---

Hao Zheng<sup>1\*</sup> Shiyu Liang<sup>1\*†</sup> Yuting Zheng<sup>1</sup> Chaofan Sun<sup>1</sup> Lei Bai<sup>2</sup> Enhui Liao<sup>1</sup>

<sup>1</sup>Shanghai Jiao Tong University, China <sup>2</sup>Shanghai Artificial Intelligence Laboratory, China  
{hubert.zheng, lsy18602808513, zhengyt058, scf024, ehliao}@sjtu.edu.cn  
baisanshi@gmail.com

## Abstract

Reconstructing ocean surface nutrients from sparse observations is critical for understanding long-term biogeochemical cycles. Most prior work focuses on reconstructing atmospheric fields and treats the reconstruction problem as image inpainting, assuming smooth, single-scale dynamics. In contrast, nutrient transport follows advection–diffusion dynamics under nonstationary, multiscale ocean flow. This mismatch leads to instability, as small errors in unresolved eddies can propagate through time and distort nutrient predictions. To address this, we introduce NUTS, a two-scale reconstruction model that decouples large-scale transport and mesoscale variability. The homogenized solver captures stable, coarse-scale advection under filtered flow. A refinement module then restores mesoscale detail conditioned on the residual eddy field. NUTS is stable, interpretable, and robust to mesoscale perturbations, with theoretical guarantees from homogenization theory. NUTS outperforms all data-driven baselines in global reconstruction and achieves site-wise accuracy comparable to numerical models. On real observations, NUTS reduces NRMSE by 79.9% for phosphate and 19.3% for nitrate over the best baseline. Ablation studies validate the effectiveness of each module.

## 1 Introduction

Reconstructing historical nutrient concentrations in the surface ocean is essential for understanding long-term biogeochemical cycles, ecosystem variability, and anthropogenic influence Stüeken et al. [2024]. However, nutrient observations are extremely sparse, especially before the bio-Argo era when data came from irregular ship-based campaigns. Even today, nutrient data remain far less available than satellite-measured variables like sea surface temperature (SST) or chlorophyll Mishonov et al. [2024], Locarnini et al. [2018].

Recent deep learning advances have driven progress in forecasting and reconstructing high-dimensional atmospheric fields. Transformer-based models Pathak et al. [2022], Bi et al. [2023], Lam et al. [2023] achieve state-of-the-art short-term forecasts by capturing temporal dependencies in data-rich regimes with complete initial conditions. In contrast, climate field reconstruction operates in sparse settings and is often framed as a spatial in-painting task Bochow et al. [2025], Plésiat et al. [2024], Kadow et al. [2020]. Early models Ronneberger et al. [2015], Dosovitskiy et al. [2020], Gao et al. [2022] focus on spatial correlations, while recent hybrids Li et al. [2020], Wang et al. [2025], Beauchamp et al. [2023] add physical constraints for greater consistency. However, these methods are mainly designed for smooth, single-scale wind fields with well-resolved large-scale structure.

---

\*Equal contribution.

†Corresponding author.

Reconstructing ocean nutrients demands a fundamentally different approach. Unlike atmospheric fields, nutrient transport follows advection–diffusion dynamics driven by a nonstationary, multiscale velocity field. Surface currents consist of a slowly evolving large-scale mean flow overlaid with rapidly fluctuating mesoscale eddies. These eddies—coherent vortices spanning 10–100 km—govern most lateral nutrient transport Vallis [2017], McWilliams [2016], Chelton et al. [2011], yet are poorly resolved in numerical circulation models due to limited resolution and inherent uncertainty. As a result, reconstruction models that rely directly on such flow fields are fragile: even small perturbations in the eddy component can degrade predictions.

Robust nutrient reconstruction presents a core modeling dilemma. Filtering the input velocity field improves stability by suppressing high-frequency eddy perturbations. However, it also removes fine-scale structures essential for capturing local nutrient gradients. Retaining all scales introduces instability; over-filtering sacrifices resolution. A principled solution must separate scales—preserving large-scale transport while reintroducing mesoscale variability in a controlled manner.

We propose NUTS, a novel and robust two-scale model that, for the first time, resolves the reconstruction challenge through a structured decomposition. At its core is a *homogenized advection–diffusion solver* that models nutrient transport under the filtered large-scale flow. By replacing unresolved mesoscale variability with an effective diffusion term, this formulation captures the net impact of fine-scale dynamics without tracking unstable eddy fluctuations. The *coarse module* leverages this framework to propagate nutrient fields with stability and physical consistency. To recover fine-scale structure, the *refinement module* models localized redistribution conditioned on the residual mesoscale flow and the coarse prediction. This coarse-to-refined architecture preserves large-scale transport patterns while restoring spatial detail in dynamically active regions. NUTS is robust to mesoscale perturbations, respects scale separation, and generalizes effectively under sparse observational coverage. We establish accuracy and stability guarantees under standard assumptions from homogenization theory, and empirically demonstrate that NUTS consistently outperforms prior baselines on both simulated and real-world datasets. Our contributions are as follows:

- We formulate nutrient reconstruction as a spatiotemporal advection–diffusion problem and reveal the vulnerability of naive methods to mesoscale perturbations.
- We propose NUTS, a two-scale model that combines a homogenized PDE solver with adaptive diffusion and a refinement module conditioned on normalized eddy flow. We provide theoretical justification of its effectiveness under standard homogenization assumptions.
- We empirically demonstrate that NUTS outperforms all data-driven baselines in global nutrient reconstruction on both simulated and real-world datasets, achieving site-wise accuracy comparable to physics-based numerical models. On the WOD dataset of real observations, NUTS reduces NRMSE by 79.9% for phosphate and 19.3% for nitrate relative to the best baseline.
- Ablation studies highlight the contribution of each component and offer empirical guidance for designing robust reconstruction architectures.

## 2 Related Work

This section outlines key related work and we provide a comprehensive review with extended background and references in Appendix A.

**Nutrient Data.** Ocean nutrient data are typically derived from observational datasets and simulation-based products. Raw observational archive, such as WOD Mishonov et al. [2024], provide high-quality and in-situ measurements but suffer from sparse and uneven distribution. In contrast, simulation-based products like the CMEMS Global Ocean Biogeochemical Hindcast (GOBH) Perruche [2018], ECCO-Darwin Carroll et al. [2020], MOM6-COBALT2 Griffies et al. [2012] can offer global coverage data product with coupled physical and biogeochemical dynamics, but require extensive calibration. Furthermore, most of these simulation-based products do not incorporate biogeochemical data assimilation and often employ simplified parameterization of biogeochemical processes, resulting in regional biases and uncertainties in nutrient fields.

**Reconstruction Approaches.** Traditional methods such as optimal interpolation Conkright et al. [2002], 3D/4D-Var Courtier et al. [1994], ensemble Kalman filters Nerger and Gregg [2008], and variational inverse models Brasseur and Haus [1991] rely on data assimilation and inverse modeling to integrate sparse observations with physical dynamics, but are often limited by computational cost



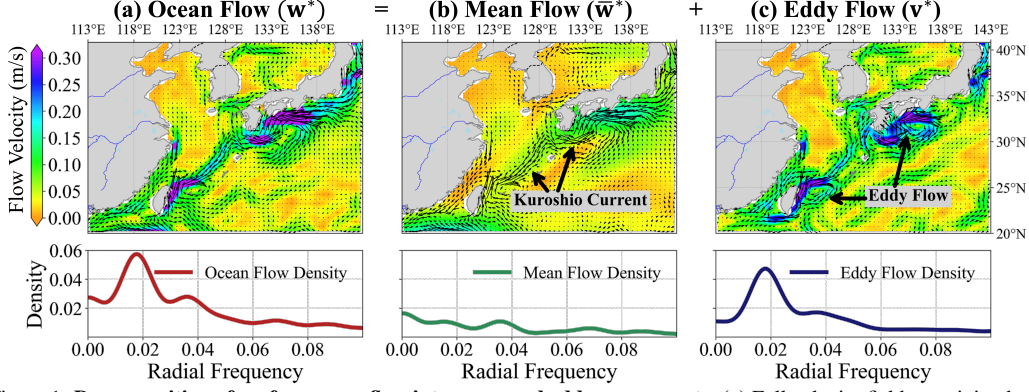

Figure 1: **Decomposition of surface ocean flow into mean and eddy components.** (a) Full velocity field containing both large-scale and mesoscale structures. (b) Mean flow obtained via low-pass filtering, capturing large-scale structures such as the Kuroshio Current. (c) Eddy flow computed as the residual, representing high-frequency mesoscale variability. Bottom panels display the radial frequency spectra corresponding to each flow component, with energy concentrated at low frequencies for the mean flow and at higher frequencies for the eddy flow, illustrating effective scale separation.

and data sparsity. Recent advances in deep learning offer alternative solutions for spatiotemporal reconstruction. CNN-based models (e.g., U-Net Ronneberger et al. [2015]) and transformers (e.g., ViT Dosovitskiy et al. [2020], Earthformer Gao et al. [2022]) capture spatial structures but lack physical grounding. Physics-informed approaches—such as neural operators Li et al. [2020], Wang et al. [2025], implicit neural representations Luo et al. [2024], and 4DVarNet Beauchamp et al. [2023]—embed governing equations or physical constraints into the learning process to improve physical consistency but are limited in capacity. Foundation models (e.g., Prithvi Schumde et al. [2024], AtmoRep Lessig et al. [2023]) show promise in meteorology but remain untested in marine biogeochemistry. General-purpose inpainting methods using GANs Zhao et al. [2021] and diffusion models Lugmayr et al. [2022] perform well in vision tasks but lack physical constraints and robustness to sparse data.

### 3 Methodology

**Notations.** Let  $\mathbb{S}^2$  denote the unit surface in  $\mathbb{R}^3$ , parameterized by latitude-longitude coordinates  $\mathbf{x} = (\theta, \phi) \in \Omega = [-\frac{\pi}{2}, \frac{\pi}{2}] \times [-\pi, \pi]$ . For a time-dependent function  $\varphi(\theta, \phi, t)$ , define  $\dot{\varphi} = \frac{\partial \varphi}{\partial t}$ . The divergence and spherical Laplacian operators are denoted  $\nabla \cdot$  and  $\nabla^2$ , respectively.

**Problem Setup.** The nutrient concentration  $\varphi$  follow the advection-diffusion equation:  $\mathcal{L}_{\mathbf{w}, \eta}[\varphi] = \dot{\varphi} + \nabla \cdot (\mathbf{w}\varphi) - \eta \nabla^2 \varphi = s$ , where  $\eta = \eta(\theta, \phi)$  denotes the time-invariant diffusion coefficient and  $s = s(\theta, \phi, t)$  represents the external source and sink terms. These terms account for biological uptake and remineralization through photosynthesis, respiration, and demineralization, as well as physical downwelling and upwelling. Given sparse nutrient measurements on  $\mathcal{Z} \times \mathcal{T} \subset \Omega \times [0, T]$  and perturbed ocean flow estimates  $\mathbf{w}$ , our goal is reconstructing nutrient concentrations by solving the constrained PDE:  $\mathcal{L}_{\mathbf{w}, \eta}[\varphi] = s$ , subject to  $\varphi|_{\mathcal{Z} \times \mathcal{T}} = f|_{\mathcal{Z} \times \mathcal{T}}$ , where  $f$  represents observed nutrient concentrations and  $f|_{\mathcal{Z} \times \mathcal{T}}$  denotes its restriction to the subset  $\mathcal{Z} \times \mathcal{T}$ .

#### 3.1 A Naive Spatial-Temporal Reconstruction Model

In this subsection, we introduce a naive spatiotemporal reconstruction model and discuss its advantage over image-inpainting-based methods. We then demonstrate its sensitivity to mesoscale perturbations in the eddy component of the ocean velocity field.

**Naive Model.** Given an interval  $[t_0, t_1]$ , the naive model first uses a data-driven initializer  $\mathcal{F}_0$  to estimate the initial nutrient field  $\hat{\varphi}(\mathbf{x}, t_0)$  through the velocity field  $\mathbf{w}$ , auxiliary variables  $\Phi$ , and sparse observations  $f$ . The estimate is then propagated by solving the advection-diffusion equation  $\mathcal{L}_{\mathbf{w}, \eta}[\hat{\varphi}] = s$ , where both the diffusion coefficient  $\eta$  and source term  $s$  are learned to match the true field. Prior work Schiesser [2012] has demonstrated that this propagation can be implemented via the method of lines (MOL), which discretizes the PDE into a system of first-order ODEs at spatial locations  $\{\mathbf{x}_k\}_k$ :  $\dot{\hat{\varphi}}(\mathbf{x}_k, t) = \hat{\varphi}(\mathbf{x}_k, t_0) + \int_{t_0}^t [-\nabla \cdot (\mathbf{w}\varphi) + \eta \nabla^2 \varphi + s](\mathbf{x}_k, \tau) d\tau$ , where the forward solution can be solved approximately using numerical solvers such as Runge-Kutta LeVeque [2007]. During the model training, all components, i.e.,  $\mathcal{F}_0$ ,  $s$  and  $\eta$  are jointly optimized to minimize

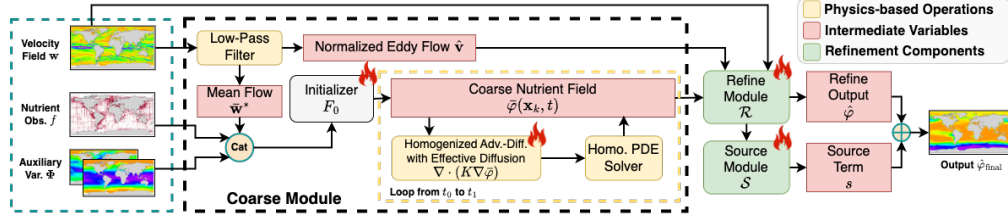

Figure 2: **Overview of NUTS.** NUTS is a two-scale model that combines a data-driven initializer, a homogenized PDE solver with learned effective diffusion, and a refinement module to reconstruct ocean nutrients under sparse observations. The velocity field is decomposed into mean and eddy components for scale separation. A learnable source module captures unresolved inputs. Trainable modules are marked with fire icons. Cat denotes channel concatenation and  $\oplus$  denotes element-wise addition.

the mean squared error between the prediction  $\hat{\varphi}$  and the ground-truth  $\varphi$ , i.e.,  $\min_{\mathcal{F}_0, s, \eta} \mathcal{L}_{\text{MSE}} \triangleq \|\varphi - \hat{\varphi}\|_2^2$ .

**Advantages over Existing Image In-painting Approach.** (1) *Physical consistency and mass conservation.* The naive model evolves nutrient fields through an advection–diffusion PDE, ensuring temporally consistent reconstructions that follow physical transport processes and conserve mass. In contrast, image in-painting methods rely purely on spatial interpolation, lacking temporal dynamics and physical grounding. (2) *Effective use of sparse observations.* By jointly learning the initializer, source term, and diffusion coefficient, the naive model directly integrates observational data to constrain transport dynamics, leading to more data-consistent estimates in sparsely sampled regions.

**Sensitivity to Mesoscale Perturbations.** The naive reconstruction approach evolves nutrient estimates using velocity fields from numerical circulation models, which accurately capture large-scale mean currents but often misrepresent mesoscale eddies due to limited resolution and structural uncertainties. Mesoscale eddies are small-scale (10–100 km), high-energy structures that play a dominant role in nutrient transport. As illustrated in Figure 1, the true velocity field  $\mathbf{w}^*$  can be decomposed into a smooth mean component  $\bar{\mathbf{w}}^*$  and a rapidly fluctuating eddy component  $\mathbf{v}^*$ . When the MOL uses a perturbed velocity field  $\mathbf{w}_\delta = \mathbf{w}^* + \delta$ , structural errors  $\delta$  in the eddy component introduce an additional transport term into the advection–diffusion dynamics:

$$\hat{\varphi}(\mathbf{x}_k, t_1) = \hat{\varphi}(\mathbf{x}_k, t_0) + \int_{t_0}^{t_1} \underbrace{\left[ -\nabla \cdot (\mathbf{w}^* \varphi) + \eta \nabla^2 \varphi + s \right]}_{\text{true advection-diffusion}}(\mathbf{x}_k, \tau) - \underbrace{\left[ \nabla \cdot (\delta \varphi) \right]}_{\text{error from flow perturbation}}(\mathbf{x}_k, \tau) d\tau. \quad (1)$$

The perturbation term scales with  $\|\delta\|$ , which can be large, as mesoscale eddies typically carry more energy than the mean flow (Figure 1). By Equation (1), such perturbations induce significant transport errors that accumulate and propagate over time. This underscores the need for reconstruction models that are robust to mesoscale flow inaccuracies.

### 3.2 NUTS: Eddy-Robust Nutrient Reconstruction via Two-Scale Modeling

We introduce **NUTS**, a principled two-scale model that reconstructs surface ocean nutrients from sparse observations and noisy velocity inputs (see Figure 2). Unlike prior approaches, NUTS separates nutrient transport into stable mean dynamics and unstable mesoscale variability. It applies a homogenized PDE solver for large-scale propagation and a refinement module for controlled recovery of fine-scale structure. This decomposition improves robustness and generalization in multiscale ocean flows. All architectural details are provided in Appendix B.

**Coarse Module Part I: Robust Initializer.** The coarse stage begins by estimating the nutrient field  $\bar{\varphi}(\mathbf{x}_k, t_0)$  at the start of the reconstruction interval. To suppress mesoscale noise, we apply a Fourier-based low-pass spatial filter to the input velocity field and extract the mean flow  $\bar{\mathbf{w}}^*$ . This filtered flow, along with sparse nutrient observations and auxiliary variables, is encoded by a spatiotemporal transformer that captures long-range dependencies across space and time. The initializer is designed to be robust to flow perturbations and produces a stable starting point for physical propagation.

**Coarse Module Part II: Homogenized PDE Solver.** To evolve the field forward, NUTS applies a homogenized advection–diffusion equation:

$$\bar{\varphi}(\mathbf{x}_k, t_1) = \bar{\varphi}(\mathbf{x}_k, t_0) + \int_{t_0}^{t_1} \left[ \underbrace{-\nabla \cdot (\bar{\mathbf{w}}^* \bar{\varphi})}_{\text{mean flow advection}} + \underbrace{\nabla \cdot (K \nabla \bar{\varphi})}_{\text{effective diffusion}} \right](\mathbf{x}_k, \tau) d\tau. \quad (2)$$

This formulation replaces unresolved mesoscale effects with an effective diffusion tensor  $K(\mathbf{x})$ , which is predicted by a hypernetwork conditioned on  $\bar{\varphi}$ . We discretize the system using the method of lines and numerically integrate it over time. This structured PDE solver ensures stable and physically grounded transport under filtered dynamics.

**Refinement Module.** The refinement stage corrects residual errors and restores mesoscale variability. It takes as input the coarse prediction  $\bar{\varphi}$ , mean flow  $\bar{\mathbf{w}}^*$ , normalized eddy velocity  $\hat{\mathbf{v}} = (\mathbf{w} - \bar{\mathbf{w}}^*)/\|\mathbf{w} - \bar{\mathbf{w}}^*\|_\infty$ , sparse observations, and static covariates. These inputs are tokenized and passed through a vision transformer  $\mathcal{R}$  that produces the refined estimate  $\hat{\varphi}(\mathbf{x}, t)$ , i.e.,  $\hat{\varphi}(\mathbf{x}, t) = \mathcal{R}[\bar{\varphi}, \bar{\mathbf{w}}^*, \hat{\mathbf{v}}, \Phi, f](\mathbf{x}, t)$ . Refinement is performed independently at each timestep and learns localized spatial redistribution driven by eddy structures.

**Source Term and Conservation Loss.** To account for unresolved sources and sinks, we introduce a learnable correction term  $s = \mathcal{S}(\hat{\varphi})$ , where  $\mathcal{S}$  is parameterized by a ResNet. The final prediction is  $\hat{\varphi}_{\text{final}} = \hat{\varphi} + s$ . To enforce physical realism, we define total nutrient mass as  $M[\varphi](t) = \sum_k \varphi(\mathbf{x}_k, t)$ , and penalize mass drift through the conservation loss:

$$\mathcal{L}_{\text{cons.}} = \int_{t_0}^{t_1} |M[\bar{\varphi}](\tau) - M[\bar{\varphi}](t_0)|^2 + |M[\hat{\varphi}](\tau) - M[\bar{\varphi}](t_0)|^2 d\tau.$$

The final training objective is:  $\mathcal{L}_{\text{total}} = \|\hat{\varphi}_{\text{final}} - \varphi\|_2^2 + \lambda \mathcal{L}_{\text{cons.}}$ , which governs the optimization of all learnable components in NUTS.

**Core Insight: Why Two-Scale Modeling Works.** The key challenge in reconstructing ocean nutrient fields lies in the dual nature of the underlying dynamics: large-scale currents govern basin-wide transport, while mesoscale eddies induce localized variability and dominate error sensitivity. NUTS addresses this by explicitly separating these two regimes. The coarse module filters out unstable mesoscale fluctuations and models stable transport via a homogenized PDE with learnable diffusion. This prevents error accumulation from uncertain eddy inputs. The refinement module then selectively reintroduces mesoscale information—not as direct forcing, but as spatial corrections conditioned on the residual flow. This two-stage architecture mirrors the physical structure of ocean transport and enables both robustness and resolution in a way that single-scale models cannot.

**Advantages over the Naive Approach.** NUTS preserves the physical grounding of the naive model, including advection–diffusion transport and the effective use of sparse observations. But it adds two critical improvements: (1) *Scale-aware architecture*. By decoupling mean and eddy-driven dynamics, NUTS reconstructs both broad circulation and localized nutrient features with greater fidelity. (2) *Built-in robustness*. Homogenization shields the system from mesoscale perturbation errors, while spatial refinement restores resolution without destabilizing temporal evolution.

**Context and Relation to Prior Work.** While prior hybrid models such as FNO Li et al. [2020], 4DVarNet Beauchamp et al. [2023], and GraphCast Lam et al. [2023] embed physical priors into data-driven forecasting pipelines, they typically rely on direct PDE application or learn-to-solve strategies that do not explicitly separate stable and unstable components. In contrast, NUTS reformulates the transport equation itself: it applies homogenization to eliminate mesoscale instability at the PDE level and delegates high-frequency recovery to a separate spatial refinement module. This scale-aware decomposition is essential for robustness in noisy flow regimes.

### 3.3 Theoretical Analysis: Effectiveness of NUTS under Eddy Perturbations

We adopt a standard multiscale formulation for ocean velocity Pavliotis and Stuart [2008], modeling  $\mathbf{w}^*(\mathbf{x}, t) = \bar{\mathbf{w}}^*(\mathbf{x}, t) + \frac{1}{\varepsilon} \mathbf{v}^*(\mathbf{x}, t; \mathbf{y}, \tau)$ , where  $\varepsilon \ll 1$  characterizes the scale separation between slow large-scale transport and fast mesoscale variability, and  $\mathbf{y} = \mathbf{x}/\varepsilon$ ,  $\tau = t/\varepsilon^2$  are fast space-time variables that resolve high-frequency eddy dynamics. The mean flow  $\bar{\mathbf{w}}^*$  governs large-scale advection, while  $\mathbf{v}^*$  captures mesoscale eddies with rapid, oscillatory fluctuations. This parabolic scaling is standard in homogenization theory for advection–diffusion systems Pardoux and Veretennikov [2005], ensuring that mesoscale variability mixes locally without inducing net large-scale transport. We further assume that both  $\mathbf{v}^*$  and the perturbation  $\delta$  satisfy the same structural form: periodic and mean-zero in the fast variables  $(\mathbf{y}, \tau)$ . This assumption is classical in homogenization theory Jikov et al. [2012] and reflects the physical behavior of mesoscale eddies—highly energetic but oscillatory and net-zero under space-time averaging.

**Theorem 1** (Informal; Accuracy and Robustness under Eddy Perturbations). *Suppose that both the true velocity field and the perturbation satisfy the periodic, mean-zero eddy flow assumption. Then, under mild regularity conditions, the NUTS prediction  $\hat{\varphi}$  differs from the true solution  $\varphi^*$  by at most  $\mathcal{O}(\varepsilon)$ , independent of the perturbation strength  $\|\delta\|_\infty$ .*

**Remark:** The formal statement and proof of this result are provided in Appendix C.

**Interpretation.** This theorem establishes two key properties of NUTS. First, the error is  $\mathcal{O}(\varepsilon)$  and independent of the perturbation strength  $\|\delta\|_\infty$ , ensuring robustness: fast, high-amplitude eddy perturbations have negligible impact on the coarse-scale reconstruction. Second, the result guarantees accuracy when the true eddy field varies on small spatial and temporal scales ( $\varepsilon \ll 1$ ). This is nontrivial, as the eddy field enters the dynamics with magnitude  $1/\varepsilon$ ; despite being mean-zero, its local influence is large. The bound confirms that the homogenized model captures the correct large-scale behavior, justifying the use of coarse dynamics in this regime.

## 4 Experiment

In this section, we answer the following research questions:

**RQ1.** How does NUTS perform in reconstructing global surface ocean nutrient concentrations compared to existing baselines, using both simulated and real-world observations?

**RQ2.** Does the proposed two-scale modeling framework enhance robustness to mesoscale perturbations? How do filtering strategies and diffusion implementations influence this robustness?

**RQ3.** How do individual design choices—such as model architecture, auxiliary inputs, conservation loss, and reconstruction interval—affect reconstruction accuracy?

### 4.1 Experimental Setup

We present the experimental setup, including datasets, baselines and evaluation metrics. Implementation and training details are in Appendix D. Code and data are available at URL.

**Data.** We conduct experiments using two datasets for global surface nutrient reconstruction. **Simulation Dataset.** To support high-quality long-term reconstruction, we release two data products generated by the numerical physical-biogeochemical model MOM6-COBALT2 Liu et al. [2022], referred to as MOM6 (Daily) and MOM6 (Monthly). The simulations were conducted on 1000 CPU cores of AMD EPYC 9654 96-Core Processors over an 11-day period, spanning 1959 to 2022 at a global nominal resolution of  $0.5^\circ$  ( $576 \times 720$ ). The model output is subsequently regridded to a uniform  $0.5^\circ$  grid ( $360 \times 720$ ) using bilinear interpolation. Each data product includes surface nitrate and phosphate concentrations, along with auxiliary variables such as temperature, salinity, and horizontal velocities ( $u, v$ ). Compared to GOBH (Monthly) Perruche [2018], our MOM6 (Monthly) data product show improved agreement with in-situ observations from WOD, achieving approximately 60% lower NRMSE on a  $0.5^\circ \times 0.5^\circ$  grid (Table 1). Additional details are provided in Appendix D.1. **Real Observations.** We use in-situ nutrient measurements from the World Ocean Database (WOD) Mishonov et al. [2024], which contains nitrate and phosphate records from 1959 to 2022. These observations are extremely sparse, covering only **0.16%** of the full spatio-temporal grid. All measurements are regridded to match the spatial and temporal resolution of the MOM6 data product.

**Tasks.** We evaluate the model on two resolution-specific nutrient reconstruction tasks. **Daily Average Reconstruction.** Sparse observations are simulated by randomly sampling nutrient values from the MOM6 (Daily) dataset at sparsity levels of 0.1%, 1%, and 10%. The

0.1% level reflects the sparsity of real-world observations, while 10% aligns with settings used in prior work Luo et al. [2024]. The model reconstructs full daily nitrate and phosphate fields using these samples together with MOM6 daily flow and auxiliary variables. **Monthly Average Reconstruction.** Real-world nutrient measurements from WOD and monthly flow and auxiliary variables from MOM6 are used to reconstruct complete monthly averages of nutrient fields. Dataset partitions are summarized in Table 2, with sampling details in Appendix D.4.

Table 1: NRMSEs ( $\downarrow$ ) of MOM6 (Monthly) and GOBH (Monthly) data compared to real observations from WOD.

| Data Source | Nitrate | Phosphate |
|-------------|---------|-----------|
| MOM6        | 0.463   | 0.301     |
| GOBH        | 1.444   | 1.335     |

Table 2: Overview of dataset divisions by year.

| Task         | Train      | Validation | Test      |
|--------------|------------|------------|-----------|
| Daily Avg.   | 2019, 2020 | 2021       | 2022      |
| Monthly Avg. | 1959–1998  | 1999–2010  | 2011–2022 |

Table 3: NRMSE ( $\downarrow$ ) of different models for reconstructing (1) global daily average nutrient concentrations from the MOM6 simulation under sampling ratios of 0.1%, 1%, and 10%, and (2) global monthly average concentrations from WOD observations. *Params* denotes the number of model parameters. The numbers after  $\pm$  are standard errors under 3 trials.

| Methods          | Params        | MOM6 (Daily)      |                   |                   |                   |                   |                   | WOD (Monthly)     |                   |
|------------------|---------------|-------------------|-------------------|-------------------|-------------------|-------------------|-------------------|-------------------|-------------------|
|                  |               | Phosphate         |                   |                   | Nitrate           |                   |                   | Phosphate         | Nitrate           |
|                  |               | 0.1%              | 1%                | 10%               | 0.1%              | 1%                | 10%               | —                 | —                 |
| Kriging(Exp.)    | —             | 0.535 $\pm$ 0.022 | 0.262 $\pm$ 0.015 | 0.184 $\pm$ 0.023 | 0.642 $\pm$ 0.020 | 0.368 $\pm$ 0.025 | 0.256 $\pm$ 0.019 | 1.275 $\pm$ 0.130 | 1.495 $\pm$ 0.091 |
| Kriging(Sph.)    | —             | 0.537 $\pm$ 0.019 | 0.276 $\pm$ 0.022 | 0.192 $\pm$ 0.020 | 0.649 $\pm$ 0.017 | 0.399 $\pm$ 0.018 | 0.272 $\pm$ 0.021 | 1.270 $\pm$ 0.086 | 1.517 $\pm$ 0.057 |
| 4D-VarNet        | 0.3M          | 0.151 $\pm$ 0.008 | 0.154 $\pm$ 0.012 | 0.156 $\pm$ 0.010 | 0.168 $\pm$ 0.006 | 0.170 $\pm$ 0.007 | 0.161 $\pm$ 0.008 | 0.187 $\pm$ 0.008 | 0.203 $\pm$ 0.009 |
| Marble           | 0.6M          | 0.397 $\pm$ 0.051 | 0.227 $\pm$ 0.044 | 0.232 $\pm$ 0.069 | 0.441 $\pm$ 0.078 | 0.222 $\pm$ 0.044 | 0.297 $\pm$ 0.047 | 0.363 $\pm$ 0.058 | 0.326 $\pm$ 0.056 |
| FNO              | 4.8M          | 0.251 $\pm$ 0.015 | 0.227 $\pm$ 0.016 | 0.229 $\pm$ 0.014 | 0.261 $\pm$ 0.012 | 0.256 $\pm$ 0.013 | 0.257 $\pm$ 0.014 | 0.244 $\pm$ 0.015 | 0.276 $\pm$ 0.017 |
| U-Net            | 31.0M         | 0.151 $\pm$ 0.008 | 0.148 $\pm$ 0.013 | 0.149 $\pm$ 0.011 | 0.169 $\pm$ 0.007 | 0.166 $\pm$ 0.012 | 0.167 $\pm$ 0.013 | 0.174 $\pm$ 0.012 | 0.187 $\pm$ 0.008 |
| ViT              | 77.7M         | 0.257 $\pm$ 0.032 | 0.242 $\pm$ 0.044 | 0.359 $\pm$ 0.048 | 0.311 $\pm$ 0.046 | 0.256 $\pm$ 0.044 | 0.256 $\pm$ 0.052 | 0.263 $\pm$ 0.034 | 0.260 $\pm$ 0.002 |
| AtmoRep          | 0.7B          | 0.196 $\pm$ 0.010 | 0.194 $\pm$ 0.011 | 0.192 $\pm$ 0.010 | 0.190 $\pm$ 0.009 | 0.219 $\pm$ 0.011 | 0.218 $\pm$ 0.013 | 0.206 $\pm$ 0.013 | 0.260 $\pm$ 0.013 |
| Prithvi          | 2.3B          | 0.216 $\pm$ 0.055 | 0.197 $\pm$ 0.043 | 0.208 $\pm$ 0.054 | 0.279 $\pm$ 0.049 | 0.274 $\pm$ 0.057 | 0.275 $\pm$ 0.036 | 0.222 $\pm$ 0.042 | 0.338 $\pm$ 0.046 |
| <b>NUTS</b>      | <b>125.6M</b> | 0.014 $\pm$ 0.002 | 0.015 $\pm$ 0.001 | 0.022 $\pm$ 0.002 | 0.143 $\pm$ 0.003 | 0.136 $\pm$ 0.003 | 0.142 $\pm$ 0.004 | 0.035 $\pm$ 0.002 | 0.151 $\pm$ 0.003 |
| <b>Promotion</b> | —             | <b>90.7%</b>      | <b>89.9%</b>      | <b>85.2%</b>      | <b>14.9%</b>      | <b>18.1%</b>      | <b>11.8%</b>      | <b>79.9%</b>      | <b>19.3%</b>      |

**Baselines.** We compare our model against a wide range of baselines grouped into six categories: (1) Kriging interpolation with exponential and spherical variogram models; (2) CNN-based model U-Net Ronneberger et al. [2015]; (3) transformer-based model ViT Dosovitskiy et al. [2020]; (4) neural operator Fourier Neural Operator (FNO) Li et al. [2020]; (5) implicit representation method Marble model Wang et al. [2025]; (6) foundation models pretrained on climate data, including Prithvi WxC Schmude et al. [2024] and AtmoRep Lessig et al. [2023]; (7) physics-guided hybrid assimilation model such as 4DVarNet Beauchamp et al. [2023]. All baselines except Marble and Kriging reconstruct each frame independently using static inputs—observations, auxiliary variables, and velocity fields at a single time step. Marble leverages temporal observations but excludes auxiliary variables and flow inputs. Kriging uses only static observations. In contrast, our model takes temporal sequences of all inputs and generates spatiotemporal nutrient reconstructions. See Appendix B.2 and D.5 for details.

**Metrics.** We use Normalized Root Mean Squared Error (NRMSE) to evaluate model performance, which ensures scale independence Shcherbakov et al. [2013]. We first calculate the latitude-weighted RMSE between the reconstructed values and the corresponding ground-truth, while NRMSE is obtained by normalizing RMSE using the mean of the ground-truth.

## 4.2 Main Results (RQ1)

We compare the reconstruction performance of our model on simulation and observation data as summarized in Table 3 and Figure 4.

**Obs 1: NUTS achieves the lowest NRMSE across all daily and monthly reconstruction tasks.** We evaluate performance under varying observation sparsity across simulated and real-world datasets. As shown in Table 3, NUTS consistently outperforms all baselines. On the daily task with 0.1% sparsity, it reduces NRMSE by 90.7% for phosphate and 14.9% for nitrate compared to U-Net. On the monthly WOD dataset, it achieves 79.9% and 19.3% improvement, respectively. The gain is more substantial for phosphate, which exhibits smoother temporal variation and is easier to model dynamically. Figure 3 supports this, showing the spatial distribution of the phosphate-to-nitrate ratio of coefficients of variation (CVs), where each CV is defined as the temporal standard deviation divided by the mean concentration. Lower values indicate weaker phosphate fluctuations, which NUTS captures more reliably.

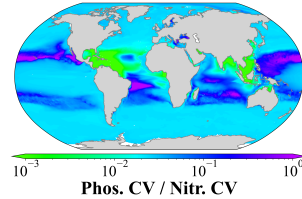

Figure 3: Spatial distribution of the phosphate-to-nitrate ratio of coefficients of variation.

Among baselines, U-Net and 4D-VarNet perform best. U-Net extracts multiscale features via skip-connected encoders Ronneberger et al. [2015], while 4D-VarNet enforces physical consistency through advection-aware design Beauchamp et al. [2023]. NUTS combines both principles—multiscale modeling and physics-based dynamics—yielding consistent improvements across sparsity levels. These gains are especially pronounced under low observation density, where auxiliary physical variables become essential for accurate reconstruction. Baselines that lack such inputs—such as Kriging (Exp.) and (Sph.)—exhibit large accuracy drops. In contrast, NUTS remains robust by

Table 4: **Model Analysis (NRMSE ↓).** (a) Comparison of different low-pass filter types; (b) Evaluation of cutoff ratios for frequency filtering; (c) Comparison of advection–diffusion implementations, including advection-only, fixed diffusion matrix, and learned diffusion network. Unless otherwise specified, the target nutrient is nitrate, the low-pass filter is Fourier-based with a cutoff ratio of 0.1, and the diffusion module is implemented using a 6-layer ResNet.

| (a) Filter Type. |              |              | (b) Filter Cutoff Ratio. |              |              | (c) Implementation of Advection Diffusion. |              |              |
|------------------|--------------|--------------|--------------------------|--------------|--------------|--------------------------------------------|--------------|--------------|
| filter           | Daily        | Monthly      | param.                   | Daily        | Monthly      | case                                       | Daily        | Monthly      |
| Fourier          | <b>0.136</b> | <b>0.151</b> | 0.1                      | <b>0.136</b> | <b>0.151</b> | advection-only                             | 0.138        | 0.176        |
| Wavelet          | 0.144        | 0.197        | 0.2                      | 0.145        | 0.194        | adv. + diffusion matrix                    | 0.142        | 0.165        |
| Gaussian         | 0.143        | 0.169        | 0.5                      | 0.145        | 0.189        | adv. + diffusion network                   | <b>0.136</b> | <b>0.151</b> |
| Moving Avg.      | 0.154        | 0.167        | 1.0                      | 0.171        | 0.189        |                                            |              |              |

leveraging oceanographic drivers like sea surface temperature, as further confirmed in our ablation study in Section 5.

**Obs 2: In reconstructing real observation site records, our model outperforms data-driven baselines and matches the performance of traditional numerical methods.** We evaluate the site-wise reconstruction accuracy by training on 75% of WOD sites and testing on the remaining 25%. As shown in Figure 4, NUTS achieves site-wise NRMSEs of 1.32 for phosphate and 2.18 for nitrate, outperforming all data-driven baselines. Its performance is comparable to traditional numerical models, including MOM6 and GOBH, demonstrating strong generalization under real-world sparsity.

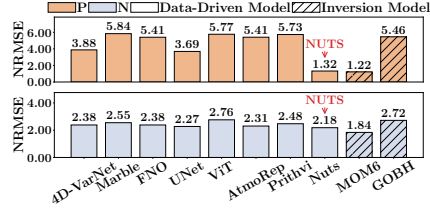

Figure 4: Site-wise NRMSE (↓) of different methods evaluated on WOD real observation.

### 4.3 Component Analysis: Contribution of the Coarse and Refinement Modules (RQ2)

We evaluate the contribution of two key coarse-stage components—low-pass filtering and effective diffusion—as well as the refinement module. NUTS is compared against U-Net and three ablated variants, each omitting a specific component while keeping all other settings fixed. The structural details of these variants are summarized in Table 5, and all variants are parameter-matched with NUTS for a fair comparison. All ablation results reported in this section use nitrate as the reconstruction target. Results for the daily task are reported under a 1% sparsity ratio. Full hyperparameter configurations are provided in Appendix D.5.

**Obs 3: Our model achieves both robustness and accuracy; filtering alone improves stability but sacrifices mesoscale information.** We assess robustness by perturbing the eddy component  $\mathbf{v}^*$  using Fourier-based scaling, generating  $\delta = \gamma \mathbf{v}^*$ , and injecting it into the velocity field. As shown in Figure 5, NUTS maintains low NRMSE across all perturbation levels, demonstrating strong resilience to mesoscale variability. *Naive-B*, which directly propagates the full velocity field without filtering, suffers large errors—especially at  $\gamma = \pm 1$ —highlighting its sensitivity to unresolved eddy perturbations. *Naive-F* improves robustness by suppressing high-frequency noise but exhibits degraded accuracy due to the removal of informative mesoscale signals. In contrast, NUTS combines the strengths of both: the coarse stage stabilizes dynamics through filtering, while the refinement stage recovers fine-scale nutrient structure conditioned on residual eddy flow.

**Obs 4: Effective diffusion enhances filtered transport, but refinement is essential for recovering mesoscale structure.** As shown in Figure 5, *Naive-(F+D)*—which combines flow filtering with the effective diffusion module—achieves lower RMSE than *Naive-F* and remains robust under mesoscale perturbations. This validates the use of homogenized advection–diffusion dynamics to stabilize transport and retain partial mesoscale effects. However, despite comparable architecture and parameter count, *Naive-(F+D)* still underperforms our full model, highlight-

Table 5: Overview of Model Ablation Variants. “B”, “F” and “F+D” represent the base model, the base model with filtering, and the base model with both filtering and diffusion, respectively. ✓ denotes inclusion; × denotes exclusion.

| Variants           | Params Count | Low-pass Filter | Effective Diffusion | Refine Module |
|--------------------|--------------|-----------------|---------------------|---------------|
| <i>Naive-B</i>     | 131.9M       | ×               | ×                   | ×             |
| <i>Naive-F</i>     | 131.9M       | ✓               | ×                   | ×             |
| <i>Naive-(F+D)</i> | 131.7M       | ✓               | ✓                   | ×             |
| NUTS               | 125.6M       | ✓               | ✓                   | ✓             |

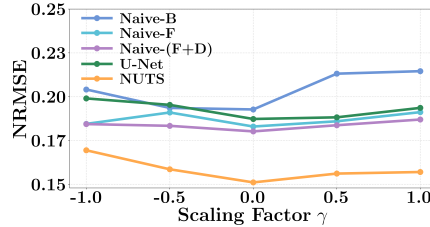

Figure 5: NRMSE of different models under varying mesoscale perturbation levels.



Table 6: **Ablation Study (NRMSE ↓).** (a) Comparison of coarse-stage initializers, including static and dynamic architectures; (b) Analysis of model depth in the coarse module; (c) Analysis of model depth in the refinement module; (d) Evaluation of source and conservation loss terms; (e) Quantification of the impact of auxiliary input variables; (f) Assessment of sensitivity to temporal interval length. All experiments use the default setting: coarse/refine depth of 12/6, all loss terms and inputs included, and interval length set to 4.

| (a) Coarse Model Structure. |              |              | (b) Depth of Coarse Module. |              |              | (c) Depth of Refine Module. |              |              |
|-----------------------------|--------------|--------------|-----------------------------|--------------|--------------|-----------------------------|--------------|--------------|
| case                        | Daily        | Monthly      | depth                       | Daily        | Monthly      | depth                       | Daily        | Monthly      |
| 2D CNN                      | 0.206        | 0.161        | 6                           | 0.185        | 0.160        | 2                           | 0.142        | 0.164        |
| ViT                         | 0.159        | 0.157        | 8                           | 0.165        | 0.153        | 4                           | 0.146        | 0.210        |
| 3D CNN                      | 0.162        | 0.153        | 12                          | <b>0.136</b> | <b>0.151</b> | 6                           | <b>0.136</b> | <b>0.151</b> |
| NUTS                        | <b>0.136</b> | <b>0.151</b> | 16                          | 0.148        | 0.177        | 8                           | 0.180        | 0.170        |

  

| (d) Source and Conservation Loss. |              |              | (e) Auxiliary Variables. |       |         | (f) Interval Length. |              |              |
|-----------------------------------|--------------|--------------|--------------------------|-------|---------|----------------------|--------------|--------------|
| case                              | Daily        | Monthly      | removed var.             | Daily | Monthly | length               | Daily        | Monthly      |
| w/ src, w/ cons.                  | <b>0.136</b> | <b>0.151</b> | temp.                    | 1.059 | 1.014   | 1                    | 0.159        | 0.157        |
| w/ src, w/o cons.                 | 0.153        | <b>0.151</b> | salt                     | 0.170 | 0.168   | 2                    | 0.166        | <b>0.151</b> |
| w/o src, w/ cons.                 | 0.156        | 0.155        | u                        | 0.164 | 0.155   | 4                    | <b>0.136</b> | <b>0.151</b> |
| w/o src, w/o cons.                | 0.155        | 0.154        | v                        | 0.142 | 0.160   | 8                    | 0.220        | 0.158        |

ing the importance of the refinement module in reconstructing fine-scale nutrient variability lost during filtering.

**Obs 5: Filter design in the coarse module is critical; Fourier filtering with strong high-frequency suppression yields the best performance.** We ablate the design of the low-pass filter used in the coarse module of NUTS. Among several options, the Fourier filter achieves the lowest NRMSE on both daily (0.136) and monthly (0.151) tasks, outperforming wavelet, Gaussian, and moving average filters (Table 4a). This result is consistent with prior work in ocean modeling and geophysical fluid dynamics Abernathey and Marshall [2013], Callies and Ferrari [2013], where spectral (Fourier-based) filtering is widely adopted to separate large-scale flow from unresolved mesoscale variability. We further vary the cutoff ratio of the Fourier filter, which determines the extent of high-frequency suppression. Lower ratios—removing more unresolved eddy components—consistently improve reconstruction accuracy, while higher ratios degrade performance (Table 4b). These results highlight that principled filtering in the coarse module is essential for stabilizing nutrient transport, while fine-scale variability is later recovered by the refinement stage.

**Obs 6: Incorporating a learnable diffusion module improves accuracy; state-dependent designs further enhance performance.** We ablate the diffusion design in the advection–diffusion solver of NUTS. We compare three variants: (1) advection-only, (2) with a trainable, time-invariant diffusion matrix  $K = UU^\top$ , and (3) the state-dependent formulation used in NUTS, where  $K = GG^\top$  and  $G = G(\bar{\varphi})$  is produced by a hyper-network conditioned on the coarse prediction  $\bar{\varphi}$ . As shown in Table 4c, both diffusion-enhanced variants outperform the advection-only baseline on daily and monthly tasks, confirming the benefit of modeling unresolved subgrid dispersion. The state-dependent design used in NUTS further improves accuracy over the time-invariant variant (0.151 vs. 0.165 on the monthly task), consistent with the theoretical expectation that effective diffusion depends on the tracer state McWilliams [2006], McDougall and McIntosh [2001]. The improvement is more substantial in the monthly setting, where longer temporal scales allow diffusion to play a more dominant role in shaping nutrient transport.

## 5 Discussions

**Ablation Study (RQ3).** We evaluate the impact of architectural selection of both modules, source module, loss design, auxiliary variables and temporal interval length on model performance. Additional ablation results on spatial and temporal resolution, as well as the conservation loss weight coefficient, are provided in Appendix E.1. All ablation results in this section use nitrate as the target variable. • **Coarse and Refine Module Structure.** We evaluate architecture and depth for both the coarse and refinement modules. As shown in Table 6a, static 2D CNNs underperform due to the lack of temporal modeling, while dynamic architectures—3D CNN and spatiotemporal ViT—achieve lower errors. NUTS, which uses a spatiotemporal transformer, yields the best NRMSE of 0.151. Depth analysis (Tables 6b, 6c) shows that performance peaks with 12 layers in the coarse module and 6 layers in the refinement module. Shallower models underfit, while deeper ones degrade due to over-smoothing or training instability. These results highlight the importance of both dynamic structure and moderate depth. • **Source and Conservation Loss.** Incorporating the source module

and conservation loss enhances reconstruction accuracy (Table 6d). Additionally, the conservation loss contributes to preserving total nutrient mass, as detailed in Appendix E.2. **•Auxiliary Variables.** Sea surface temperature is the most influential auxiliary input, with its removal causing the largest increase in reconstruction error (Table 6e). This highlights its essential role in guiding nutrient reconstruction and is consistent with prior findings in related work such as 4DVarNet Beauchamp et al. [2023]. **•Reconstruction Interval Length.** Model performance is sensitive to the choice of reconstruction interval length, with both short and long intervals resulting in higher error relative to intermediate settings (Table 6f). In the daily task, a 4-step interval yields the lowest NRMSE (0.136), balancing informative temporal context and noise from redundancy or uncorrelated variability.

**Conclusion and Broader Impact.** We present NUTS, a two-stage, physics-informed framework for reconstructing global surface ocean nutrients from sparse observations. By combining coarse advection–diffusion dynamics with data-driven refinement, NUTS achieves state-of-the-art performance on both simulated and real-world datasets. While our experiments focus on nitrate and phosphate, the framework is grounded in general transport physics and naturally extends to other passive tracers. Preliminary results (Appendix F) show promising generalization, supporting broader applications in environmental reconstruction, climate monitoring, and Earth system science.

**Future Work.** Future directions include extending NUTS in three areas: spatial coverage, biogeochemical complexity, and air–sea exchange. A 3D extension will capture vertical transport and subsurface gradients. Adding processes like remineralization and nutrient uptake will improve modeling of regeneration and biological consumption. Air–sea gas exchange will enable reconstruction of gas tracers for carbon and oxygen cycle monitoring.

## Acknowledgements

This research is supported by the National Natural Science Foundation of China (No. 62306179), the National Key Research and Development Program of China (2023YFC2808802), Southern Marine Science and Engineering Guangdong Laboratory (Zhuhai) (nos. SML2023SP219), the Ocean Negative Carbon Emissions (ONCE) Program.

## References

- Eva E Stüeken, Alice Pellerin, Christophe Thomazo, Benjamin W Johnson, Samuel Duncanson, and Shane D Schoepfer. Marine biogeochemical nitrogen cycling through earth’s history. *Nature Reviews Earth & Environment*, 5(10):732–747, 2024.
- Alexey V Mishonov, Tim P Boyer, Olga K Baranova, Courtney N Bouchard, Scott L Cross, Hernan E Garcia, Ricardo A Locarnini, Christopher R Paver, James R Reagan, Zhankun Wang, et al. World ocean database 2023. 2024.
- MM Locarnini, AV Mishonov, OK Baranova, TP Boyer, MM Zweng, HE Garcia, D Seidov, KW Weathers, CR Paver, I Smolyar, et al. World ocean atlas 2018, volume 1: Temperature. 2018.
- Jaideep Pathak, Aditya Subramanian, Peter Harrington, et al. Fourcastnet: A global data-driven high-resolution weather model using adaptive fourier neural operators. *Advances in Neural Information Processing Systems*, 2022.
- Kaifeng Bi, Lingxi Xie, Hengheng Zhang, Xin Chen, Xiaotao Gu, and Qi Tian. Accurate medium-range global weather forecasting with 3d neural networks. *Nature*, 619(7970):533–538, 2023.
- Remi Lam, Alvaro Sanchez-Gonzalez, Matthew Willson, Peter Wirsberger, Meire Fortunato, Ferran Alet, Suman Ravuri, Timo Ewalds, Zach Eaton-Rosen, Weihua Hu, et al. Learning skillful medium-range global weather forecasting. *Science*, 382(6677):1416–1421, 2023.
- Nils Bochow, Anna Poltronieri, Martin Rypdal, and Niklas Boers. Reconstructing historical climate fields with deep learning. *Science Advances*, 11(14):eadp0558, 2025. doi: 10.1126/sciadv.adp0558. URL <https://www.science.org/doi/abs/10.1126/sciadv.adp0558>.



- Étienne Pléziat, Robert JH Dunn, Markus G Donat, and Christopher Kadow. Artificial intelligence reveals past climate extremes by reconstructing historical records. *Nature Communications*, 15(1): 9191, 2024.
- Christopher Kadow, David Matthew Hall, and Uwe Ulbrich. Artificial intelligence reconstructs missing climate information. *Nature Geoscience*, 13(6):408–413, Jun 2020. ISSN 1752-0908. doi: 10.1038/s41561-020-0582-5. URL <https://doi.org/10.1038/s41561-020-0582-5>.
- Olaf Ronneberger, Philipp Fischer, and Thomas Brox. U-net: Convolutional networks for biomedical image segmentation, 2015. URL <https://arxiv.org/abs/1505.04597>.
- Alexey Dosovitskiy, Lucas Beyer, Alexander Kolesnikov, Dirk Weissenborn, Xiaohua Zhai, Thomas Unterthiner, Mostafa Dehghani, Matthias Minderer, Georg Heigold, Sylvain Gelly, et al. An image is worth 16x16 words: Transformers for image recognition at scale. *arXiv:2010.11929*, 2020.
- Zhihan Gao, Xingjian Shi, Hao Wang, Yi Zhu, Yuyang Bernie Wang, Mu Li, and Dit-Yan Yeung. Earthformer: Exploring space-time transformers for earth system forecasting. *Advances in Neural Information Processing Systems*, 35:25390–25403, 2022.
- Zongyi Li, Nikola Kovachki, Kamyar Azizzadenesheli, Burigede Liu, Kaushik Bhattacharya, Andrew Stuart, and Anima Anandkumar. Fourier neural operator for parametric partial differential equations. *arXiv:2010.08895*, 2020.
- Honghui Wang, Shiji Song, and Gao Huang. Gridmix: Exploring spatial modulation for neural fields in pde modeling. In *The Thirteenth International Conference on Learning Representations*, 2025.
- Maxime Beauchamp, Quentin Febvre, Hugo Georgenthum, and Ronan Fablet. 4dvarnet-ssh: end-to-end learning of variational interpolation schemes for nadir and wide-swath satellite altimetry. *Geoscientific Model Development*, 16(8):2119–2147, 2023.
- Geoffrey K Vallis. *Atmospheric and Oceanic Fluid Dynamics*. Cambridge University Press, 2017.
- James C McWilliams. Submesoscale currents in the ocean. *Proceedings of the Royal Society A: Mathematical, Physical and Engineering Sciences*, 472(2189):20160117, 2016.
- Dudley B Chelton, Michael G Schlax, Roger M Samelson, and R A de Szoeke. The influence of nonlinear mesoscale eddies on near-surface oceanic chlorophyll. *Science*, 334(6054):328–332, 2011.
- Coralie Perruche. Product user manual for the global ocean biogeochemistry hindcast global\_reanalysis\_bio\_001\_029. version 1. 2018.
- D Carroll, D Menemenlis, JF Adkins, KW Bowman, H Brix, S Dutkiewicz, I Fenty, MM Gierach, C Hill, O Jahn, et al. The ecco-darwin data-assimilative global ocean biogeochemistry model: Estimates of seasonal to multidecadal surface ocean pco2 and air-sea co2 flux. *Journal of Advances in Modeling Earth Systems*, 12(10):e2019MS001888, 2020.
- Stephen M Griffies et al. Elements of the modular ocean model (mom). *GFDL Ocean Group Tech. Rep*, 7(620):47, 2012.
- Margarita E Conkright, Ricardo A Locarnini, Hernan E Garcia, Todd D O’Brien, Timothy P Boyer, C Stephens, and John I Antonov. World ocean atlas 2001: Objective analyses, data statistics, and figures: Cd-rom documentation. 2002.
- PHILIPPE Courtier, J-N Thépaut, and Anthony Hollingsworth. A strategy for operational implementation of 4d-var, using an incremental approach. *Quarterly Journal of the Royal Meteorological Society*, 120(519):1367–1387, 1994.
- Lars Nerger and Watson W Gregg. Improving assimilation of seawifs data by the application of bias correction with a local seik filter. *Journal of marine systems*, 73(1-2):87–102, 2008.
- Pierre P Brasseur and Jacques A Haus. Application of a 3-d variational inverse model to the analysis of ecohydrodynamic data in the northern bering and southern chukchi seas. *Journal of Marine Systems*, 1(4):383–401, 1991.

- Xihaier Luo, Wei Xu, Yihui Ren, Shinjae Yoo, and Balu Nadiga. Continuous field reconstruction from sparse observations with implicit neural networks. *arXiv:2401.11611*, 2024.
- Johannes Schmude, Sujit Roy, Will Trojak, Johannes Jakubik, Daniel Salles Civitarese, Shraddha Singh, Julian Kuehnert, Kumar Ankur, Aman Gupta, Christopher E Phillips, et al. Prithvi wxc: Foundation model for weather and climate. *arXiv:2409.13598*, 2024.
- Christian Lessig, Ilaria Luise, Bing Gong, Michael Langguth, Scarlet Stadtler, and Martin Schultz. Atmorep: A stochastic model of atmosphere dynamics using large scale representation learning. *arXiv:2308.13280*, 2023.
- Shengyu Zhao, Jonathan Cui, Yilun Sheng, Yue Dong, Xiao Liang, Eric I Chang, and Yan Xu. Large scale image completion via co-modulated generative adversarial networks. *arXiv preprint arXiv:2103.10428*, 2021.
- Andreas Lugmayr, Martin Danelljan, Andres Romero, Fisher Yu, Radu Timofte, and Luc Van Gool. Repaint: Inpainting using denoising diffusion probabilistic models. In *Proceedings of the IEEE/CVF conference on computer vision and pattern recognition*, pages 11461–11471, 2022.
- William E Schiesser. *The numerical method of lines: integration of partial differential equations*. Elsevier, 2012.
- Randall J. LeVeque. *Finite Difference Methods for Ordinary and Partial Differential Equations*. Society for Industrial and Applied Mathematics, 2007. doi: 10.1137/1.9780898717839. URL <https://epubs.siam.org/doi/abs/10.1137/1.9780898717839>.
- Grigoris Pavliotis and Andrew Stuart. *Multiscale methods: averaging and homogenization*. Springer Science & Business Media, 2008.
- E. Pardoux and A. Yu. Veretennikov. On the poisson equation and diffusion approximation 3. *The Annals of Probability*, 33(3), May 2005. ISSN 0091-1798. doi: 10.1214/009117905000000062. URL <http://dx.doi.org/10.1214/009117905000000062>.
- Vasili Vasilievitch Jikov, Sergei M Kozlov, and Olga Arsenievna Oleinik. *Homogenization of differential operators and integral functionals*. Springer Science & Business Media, 2012.
- Xiao Liu, Charles Stock, John Dunne, Minjin Lee, Elena Shevliakova, Sergey Malyshev, Paul C.D. Milly, and Matthias Büchner. Isimip3a ocean physical and biogeochemical input data [gfdl-mom6-cobalt2 dataset], 2022. URL <https://doi.org/10.48364/ISIMIP.920945>.
- Maxim Vladimirovich Shcherbakov, Adriaan Brebels, Nataliya Lvovna Shcherbakova, Anton Pavlovich Tyukov, Timur Alexandrovich Janovsky, Valeriy Anatol’evich Kamaev, et al. A survey of forecast error measures. *World applied sciences journal*, 24(24):171–176, 2013.
- Ryan Abernathey and John Marshall. Global surface eddy diffusivities derived from satellite altimetry. *Journal of Geophysical Research: Oceans*, 118(2):901–916, 2013. doi: 10.1002/jgrc.20066.
- Jörn Callies and Raffaele Ferrari. Interpreting energy and tracer spectra of upper-ocean turbulence in the submesoscale range (1–200 km). *Journal of Physical Oceanography*, 43(11):2456–2474, 2013. doi: 10.1175/JPO-D-13-063.1. URL <https://journals.ametsoc.org/view/journals/phoc/43/11/jpo-d-13-063.1.xml>.
- James C. McWilliams. *Fundamentals of Geophysical Fluid Dynamics*. Cambridge University Press, 2006.
- Trevor J. McDougall and Peter C. McIntosh. The temporal-residual-mean velocity. part ii: Isopycnal interpretation and the tracer equation. *Journal of Physical Oceanography*, 31(5):1222–1246, 2001. doi: 10.1175/1520-0485(2001)031<1222:TTRMVP>2.0.CO;2.
- Alistair Adcroft, Jean-Michel Campin, E Doddridge, S Dutkiewicz, C Evangelinos, D Ferreira, M Follows, G Forget, B Fox-Kemper, P Heimbach, et al. Mitgcm documentation. *Release checkpoint67a-12-gbf23121*, 19, 2018.

- Alexander F Shchepetkin and James C McWilliams. The regional oceanic modeling system (roms): a split-explicit, free-surface, topography-following-coordinate oceanic model. *Ocean modelling*, 9(4):347–404, 2005.
- Malek Belgacem, Katrin Schroeder, Alexander Barth, Charles Troupin, Bruno Pavoni, and Jacopo Chiggiato. Climatological distribution of dissolved inorganic nutrients in the western mediterranean sea (1981–2017). *Earth System Science Data Discussions*, 2021:1–49, 2021.
- Ariane Verdy and Matthew R Mazloff. A data assimilating model for estimating southern ocean biogeochemistry. *Journal of Geophysical Research: Oceans*, 122(9):6968–6988, 2017.
- Cecile S Rousseaux and Watson W Gregg. Climate variability and phytoplankton composition in the pacific ocean. *Journal of Geophysical Research: Oceans*, 117(C10), 2012.
- Wanqin Zhong, Xin Ma, Tianqi Shi, Ge Han, Haowei Zhang, and Wei Gong. Reconstruction of global ocean surface pco<sub>2</sub> and air-sea co<sub>2</sub> flux: Based on multigrained cascade forest model. *Journal of Geophysical Research: Oceans*, 130(2):e2024JC021483, 2025.
- Maziar Raissi, Paris Perdikaris, and George Em Karniadakis. Physics informed deep learning (part i): Data-driven solutions of nonlinear partial differential equations. *arXiv:1711.10561*, 2017.
- Eugenio Cutolo, Ananda Pascual, Simon Ruiz, Nikolaos D Zarokanellos, and Ronan Fablet. Cloinet: ocean state reconstructions through remote-sensing, in-situ sparse observations and deep learning. *Frontiers in Marine Science*, 11:1151868, 2024.
- Bin Lu, Ze Zhao, Luyu Han, Xiaoying Gan, Yuntao Zhou, Lei Zhou, Luoyi Fu, Xinbing Wang, Chenghu Zhou, and Jing Zhang. Oxygenerator: Reconstructing global ocean deoxygenation over a century with deep learning. *arXiv:2405.07233*, 2024.
- Kamyar Nazeri, Eric Ng, Tony Joseph, Faisal Z Qureshi, and Mehran Ebrahimi. Edgeconnect: Generative image inpainting with adversarial edge learning. *arXiv:1901.00212*, 2019.
- Wenbo Li, Zhe Lin, Kun Zhou, Lu Qi, Yi Wang, and Jiaya Jia. Mat: Mask-aware transformer for large hole image inpainting. In *Proceedings of the IEEE/CVF conference on computer vision and pattern recognition*, pages 10758–10768, 2022.
- Tobias Pfaff, Meire Fortunato, Alvaro Sanchez-Gonzalez, and Peter Battaglia. Learning mesh-based simulation with graph networks. In *International conference on learning representations*, 2020.
- Dan Hendrycks and Kevin Gimpel. Gaussian error linear units (gelus). *arXiv:1606.08415*, 2016.
- Alain Bensoussan, Jacques-Louis Lions, and George Papanicolaou. *Asymptotic analysis for periodic structures*. American Mathematical Society, 2011.
- Andrew J Majda and Peter R Kramer. Simplified models for turbulent diffusion: Theory, numerical modelling, and physical phenomena. *Physics Reports*, 314(4-5):237–574, 1999.
- Gary Froyland, Kathrin Padberg, Matthew H England, and Anne Marie Treguier. Detection of coherent oceanic structures via transfer operators. *Physical review letters*, 98(22):224503, 2007.
- Peter B Rhines. Geostrophic turbulence. *Annual Review of Fluid Mechanics*, 11(1):401–441, 1979.
- Kevin Sieck and Daniela Jacob. Influence of the boundary forcing on the internal variability of a regional climate model. *American Journal of Climate Change*, 5(3):373–382, 2016.
- Grigorios A Pavliotis. *Homogenization Theory for Advection–Diffusion Equations with Mean Flow*. PhD thesis, Rensselaer Polytechnic Institute, 2002.
- Thierry Goudon and Frédéric Poupaud. Homogenization of transport equations: Weak mean field approximation. *SIAM Journal on Mathematical Analysis*, 36(3):856–881, 2005.

- Alistair Adcroft, Whit Anderson, V. Balaji, Chris Blanton, Mitchell Bushuk, Carolina O. Dufour, John P. Dunne, Stephen M. Griffies, Robert Hallberg, Matthew J. Harrison, Isaac M. Held, Malte F. Jansen, Jasmin G. John, John P. Krasting, Amy R. Langenhorst, Sonya Legg, Zhi Liang, Colleen McHugh, Aparna Radhakrishnan, Brandon G. Reichl, Tony Rosati, Bonita L. Samuels, Andrew Shao, Ronald Stouffer, Michael Winton, Andrew T. Wittenberg, Baoqiang Xiang, Niki Zadeh, and Rong Zhang. The gfdl global ocean and sea ice model om4.0: Model description and simulation features. *Journal of Advances in Modeling Earth Systems*, 11(10):3167–3211, 2019. doi: 10.1029/2019ms001726. URL <https://doi.org/10.1029/2019ms001726>.
- CA Stock, JP Dunne, and JG John. Drivers of trophic amplification of ocean productivity trends in a changing climate. *Biogeosciences*, 11(24):7125–7135, 2014.
- HiroYuki Tsujino, Shogo Urakawa, Hideyuki Nakano, R Justin Small, Who M Kim, Stephen G Yeager, Gokhan Danabasoglu, Tatsuo Suzuki, Jonathan L Bamber, Mats Bentsen, et al. Jra-55 based surface dataset for driving ocean–sea-ice models (jra55-do). *Ocean Modelling*, 130:79–139, 2018.
- Fortunat Joos and Renato Spahni. Rates of change in natural and anthropogenic radiative forcing over the past 20,000 years. *Proceedings of the National Academy of Sciences*, 105(5):1425–1430, 2008.
- H. E. Garcia, R. A. Locarnini, T. P. Boyer, J. I. Antonov, O. K. Baranova, M. M. Zweng, ..., and J. R. Reagan. *World Ocean Atlas 2013, Volume 3: Dissolved Oxygen, Apparent Oxygen Utilization, and Oxygen Saturation*. Number 75 in NOAA Atlas NESDIS. NOAA, 2013a.
- H. E. Garcia, T. P. Boyer, O. K. Baranova, C. Coleman, C. R. Paver, R. A. Locarnini, ..., and J. R. Reagan. *World Ocean Atlas 2013, Volume 4: Dissolved Inorganic Nutrients (phosphate, nitrate, silicate)*. Number 76 in NOAA Atlas NESDIS. NOAA, 2013b.
- R. A. Locarnini, A. V. Mishonov, J. I. Antonov, T. P. Boyer, H. E. Garcia, O. K. Baranova, ..., and J. R. Reagan. *World Ocean Atlas 2013, Volume 1: Temperature*. Number 73 in NOAA Atlas NESDIS. NOAA, 2013.
- M. M. Zweng, J. R. Reagan, J. I. Antonov, R. A. Locarnini, A. V. Mishonov, T. P. Boyer, ..., and D. Seidov. *World Ocean Atlas 2013, Volume 2: Salinity*. Number 74 in NOAA Atlas NESDIS. NOAA, 2013.
- Are Olsen, Robert M Key, Steven Van Heuven, Siv K Lauvset, Anton Velo, Xiaohua Lin, Carsten Schirnick, Alex Kozyr, Toste Tanhua, Mario Hoppema, et al. The global ocean data analysis project version 2 (glodapv2)—an internally consistent data product for the world ocean. *Earth System Science Data*, 8(2):297–323, 2016.
- Samar Khatiwala, Francois Primeau, and T Hall. Reconstruction of the history of anthropogenic co2 concentrations in the ocean. *Nature*, 462(7271):346–349, 2009.
- I Loshchilov. Decoupled weight decay regularization. *arXiv:1711.05101*, 2017.
- Vincent Sitzmann, Julien Martel, Alexander Bergman, David Lindell, and Gordon Wetzstein. Implicit neural representations with periodic activation functions. *Advances in neural information processing systems*, 33:7462–7473, 2020.
- Gao Huang, Yu Sun, Zhuang Liu, Daniel Sedra, and Kilian Q Weinberger. Deep networks with stochastic depth. In *European conference on computer vision*, pages 646–661. Springer, 2016.

## NeurIPS Paper Checklist

### 1. Claims

Question: Do the main claims made in the abstract and introduction accurately reflect the paper's contributions and scope?

Answer: [\[Yes\]](#)

Justification: The claims in Abstract and Introduction 1 reflect the contributions of this paper.

Guidelines:

- The answer NA means that the abstract and introduction do not include the claims made in the paper.
- The abstract and/or introduction should clearly state the claims made, including the contributions made in the paper and important assumptions and limitations. A No or NA answer to this question will not be perceived well by the reviewers.
- The claims made should match theoretical and experimental results, and reflect how much the results can be expected to generalize to other settings.
- It is fine to include aspirational goals as motivation as long as it is clear that these goals are not attained by the paper.

### 2. Limitations

Question: Does the paper discuss the limitations of the work performed by the authors?

Answer: [\[Yes\]](#)

Justification: We discuss the limitations of this paper in Appendix G.

Guidelines:

- The answer NA means that the paper has no limitation while the answer No means that the paper has limitations, but those are not discussed in the paper.
- The authors are encouraged to create a separate "Limitations" section in their paper.
- The paper should point out any strong assumptions and how robust the results are to violations of these assumptions (e.g., independence assumptions, noiseless settings, model well-specification, asymptotic approximations only holding locally). The authors should reflect on how these assumptions might be violated in practice and what the implications would be.
- The authors should reflect on the scope of the claims made, e.g., if the approach was only tested on a few datasets or with a few runs. In general, empirical results often depend on implicit assumptions, which should be articulated.
- The authors should reflect on the factors that influence the performance of the approach. For example, a facial recognition algorithm may perform poorly when image resolution is low or images are taken in low lighting. Or a speech-to-text system might not be used reliably to provide closed captions for online lectures because it fails to handle technical jargon.
- The authors should discuss the computational efficiency of the proposed algorithms and how they scale with dataset size.
- If applicable, the authors should discuss possible limitations of their approach to address problems of privacy and fairness.
- While the authors might fear that complete honesty about limitations might be used by reviewers as grounds for rejection, a worse outcome might be that reviewers discover limitations that aren't acknowledged in the paper. The authors should use their best judgment and recognize that individual actions in favor of transparency play an important role in developing norms that preserve the integrity of the community. Reviewers will be specifically instructed to not penalize honesty concerning limitations.

### 3. Theory assumptions and proofs

Question: For each theoretical result, does the paper provide the full set of assumptions and a complete (and correct) proof?

Answer: [\[Yes\]](#)

Justification: We provide complete proofs for the proposed theorem in Appendix C.

Guidelines:

- The answer NA means that the paper does not include theoretical results.
- All the theorems, formulas, and proofs in the paper should be numbered and cross-referenced.
- All assumptions should be clearly stated or referenced in the statement of any theorems.
- The proofs can either appear in the main paper or the supplemental material, but if they appear in the supplemental material, the authors are encouraged to provide a short proof sketch to provide intuition.
- Inversely, any informal proof provided in the core of the paper should be complemented by formal proofs provided in appendix or supplemental material.
- Theorems and Lemmas that the proof relies upon should be properly referenced.

#### 4. Experimental result reproducibility

Question: Does the paper fully disclose all the information needed to reproduce the main experimental results of the paper to the extent that it affects the main claims and/or conclusions of the paper (regardless of whether the code and data are provided or not)?

Answer: [\[Yes\]](#)

Justification: We provide implementation details of the model in Appendix B and hyperparameter configurations in Appendix D.3. We also open-source the code and data required to conduct the experiments in this anonymized URL.

Guidelines:

- The answer NA means that the paper does not include experiments.
- If the paper includes experiments, a No answer to this question will not be perceived well by the reviewers: Making the paper reproducible is important, regardless of whether the code and data are provided or not.
- If the contribution is a dataset and/or model, the authors should describe the steps taken to make their results reproducible or verifiable.
- Depending on the contribution, reproducibility can be accomplished in various ways. For example, if the contribution is a novel architecture, describing the architecture fully might suffice, or if the contribution is a specific model and empirical evaluation, it may be necessary to either make it possible for others to replicate the model with the same dataset, or provide access to the model. In general, releasing code and data is often one good way to accomplish this, but reproducibility can also be provided via detailed instructions for how to replicate the results, access to a hosted model (e.g., in the case of a large language model), releasing of a model checkpoint, or other means that are appropriate to the research performed.
- While NeurIPS does not require releasing code, the conference does require all submissions to provide some reasonable avenue for reproducibility, which may depend on the nature of the contribution. For example
  - (a) If the contribution is primarily a new algorithm, the paper should make it clear how to reproduce that algorithm.
  - (b) If the contribution is primarily a new model architecture, the paper should describe the architecture clearly and fully.
  - (c) If the contribution is a new model (e.g., a large language model), then there should either be a way to access this model for reproducing the results or a way to reproduce the model (e.g., with an open-source dataset or instructions for how to construct the dataset).
  - (d) We recognize that reproducibility may be tricky in some cases, in which case authors are welcome to describe the particular way they provide for reproducibility. In the case of closed-source models, it may be that access to the model is limited in some way (e.g., to registered users), but it should be possible for other researchers to have some path to reproducing or verifying the results.

#### 5. Open access to data and code

Question: Does the paper provide open access to the data and code, with sufficient instructions to faithfully reproduce the main experimental results, as described in supplemental material?

Answer: [Yes]

Justification: We provide code and data in this anonymized URL.

Guidelines:

- The answer NA means that paper does not include experiments requiring code.
- Please see the NeurIPS code and data submission guidelines (<https://nips.cc/public/guides/CodeSubmissionPolicy>) for more details.
- While we encourage the release of code and data, we understand that this might not be possible, so “No” is an acceptable answer. Papers cannot be rejected simply for not including code, unless this is central to the contribution (e.g., for a new open-source benchmark).
- The instructions should contain the exact command and environment needed to run to reproduce the results. See the NeurIPS code and data submission guidelines (<https://nips.cc/public/guides/CodeSubmissionPolicy>) for more details.
- The authors should provide instructions on data access and preparation, including how to access the raw data, preprocessed data, intermediate data, and generated data, etc.
- The authors should provide scripts to reproduce all experimental results for the new proposed method and baselines. If only a subset of experiments are reproducible, they should state which ones are omitted from the script and why.
- At submission time, to preserve anonymity, the authors should release anonymized versions (if applicable).
- Providing as much information as possible in supplemental material (appended to the paper) is recommended, but including URLs to data and code is permitted.

## 6. Experimental setting/details

Question: Does the paper specify all the training and test details (e.g., data splits, hyper-parameters, how they were chosen, type of optimizer, etc.) necessary to understand the results?

Answer: [Yes]

Justification: We provide dataset divisions in Table 2, and hyper-parameter configuration details in Appendix D.3.

Guidelines:

- The answer NA means that the paper does not include experiments.
- The experimental setting should be presented in the core of the paper to a level of detail that is necessary to appreciate the results and make sense of them.
- The full details can be provided either with the code, in appendix, or as supplemental material.

## 7. Experiment statistical significance

Question: Does the paper report error bars suitably and correctly defined or other appropriate information about the statistical significance of the experiments?

Answer: [Yes]

Justification: We report standard deviations of experimental results in Table 3.

Guidelines:

- The answer NA means that the paper does not include experiments.
- The authors should answer "Yes" if the results are accompanied by error bars, confidence intervals, or statistical significance tests, at least for the experiments that support the main claims of the paper.
- The factors of variability that the error bars are capturing should be clearly stated (for example, train/test split, initialization, random drawing of some parameter, or overall run with given experimental conditions).

- The method for calculating the error bars should be explained (closed form formula, call to a library function, bootstrap, etc.)
- The assumptions made should be given (e.g., Normally distributed errors).
- It should be clear whether the error bar is the standard deviation or the standard error of the mean.
- It is OK to report 1-sigma error bars, but one should state it. The authors should preferably report a 2-sigma error bar than state that they have a 96% CI, if the hypothesis of Normality of errors is not verified.
- For asymmetric distributions, the authors should be careful not to show in tables or figures symmetric error bars that would yield results that are out of range (e.g. negative error rates).
- If error bars are reported in tables or plots, The authors should explain in the text how they were calculated and reference the corresponding figures or tables in the text.

## 8. Experiments compute resources

Question: For each experiment, does the paper provide sufficient information on the computer resources (type of compute workers, memory, time of execution) needed to reproduce the experiments?

Answer: [Yes]

Justification: We provide the compute resources used to generate the simulation data in Section 4, and the compute resources used to conduct experiments in Appendix D.3.

Guidelines:

- The answer NA means that the paper does not include experiments.
- The paper should indicate the type of compute workers CPU or GPU, internal cluster, or cloud provider, including relevant memory and storage.
- The paper should provide the amount of compute required for each of the individual experimental runs as well as estimate the total compute.
- The paper should disclose whether the full research project required more compute than the experiments reported in the paper (e.g., preliminary or failed experiments that didn't make it into the paper).

## 9. Code of ethics

Question: Does the research conducted in the paper conform, in every respect, with the NeurIPS Code of Ethics <https://neurips.cc/public/EthicsGuidelines>?

Answer: [Yes]

Justification: The research conducted in this paper conform with the NeurIPS Code of Ethics in every respect.

Guidelines:

- The answer NA means that the authors have not reviewed the NeurIPS Code of Ethics.
- If the authors answer No, they should explain the special circumstances that require a deviation from the Code of Ethics.
- The authors should make sure to preserve anonymity (e.g., if there is a special consideration due to laws or regulations in their jurisdiction).

## 10. Broader impacts

Question: Does the paper discuss both potential positive societal impacts and negative societal impacts of the work performed?

Answer: [Yes]

Justification: We discuss broader impacts of this paper in Section 5. We also provide some preliminary results in Appendix F.

Guidelines:

- The answer NA means that there is no societal impact of the work performed.
- If the authors answer NA or No, they should explain why their work has no societal impact or why the paper does not address societal impact.



- Examples of negative societal impacts include potential malicious or unintended uses (e.g., disinformation, generating fake profiles, surveillance), fairness considerations (e.g., deployment of technologies that could make decisions that unfairly impact specific groups), privacy considerations, and security considerations.
- The conference expects that many papers will be foundational research and not tied to particular applications, let alone deployments. However, if there is a direct path to any negative applications, the authors should point it out. For example, it is legitimate to point out that an improvement in the quality of generative models could be used to generate deepfakes for disinformation. On the other hand, it is not needed to point out that a generic algorithm for optimizing neural networks could enable people to train models that generate Deepfakes faster.
- The authors should consider possible harms that could arise when the technology is being used as intended and functioning correctly, harms that could arise when the technology is being used as intended but gives incorrect results, and harms following from (intentional or unintentional) misuse of the technology.
- If there are negative societal impacts, the authors could also discuss possible mitigation strategies (e.g., gated release of models, providing defenses in addition to attacks, mechanisms for monitoring misuse, mechanisms to monitor how a system learns from feedback over time, improving the efficiency and accessibility of ML).

## 11. Safeguards

Question: Does the paper describe safeguards that have been put in place for responsible release of data or models that have a high risk for misuse (e.g., pretrained language models, image generators, or scraped datasets)?

Answer: [NA]

Justification: This paper poses no such risks.

Guidelines:

- The answer NA means that the paper poses no such risks.
- Released models that have a high risk for misuse or dual-use should be released with necessary safeguards to allow for controlled use of the model, for example by requiring that users adhere to usage guidelines or restrictions to access the model or implementing safety filters.
- Datasets that have been scraped from the Internet could pose safety risks. The authors should describe how they avoided releasing unsafe images.
- We recognize that providing effective safeguards is challenging, and many papers do not require this, but we encourage authors to take this into account and make a best faith effort.

## 12. Licenses for existing assets

Question: Are the creators or original owners of assets (e.g., code, data, models), used in the paper, properly credited and are the license and terms of use explicitly mentioned and properly respected?

Answer: [No]

Justification: All code implementations are cited with license details in Appendix D.5. For the WOD dataset, although we were unable to locate the specific license, we have cited the official source and provided the official link.

Guidelines:

- The answer NA means that the paper does not use existing assets.
- The authors should cite the original paper that produced the code package or dataset.
- The authors should state which version of the asset is used and, if possible, include a URL.
- The name of the license (e.g., CC-BY 4.0) should be included for each asset.
- For scraped data from a particular source (e.g., website), the copyright and terms of service of that source should be provided.

- If assets are released, the license, copyright information, and terms of use in the package should be provided. For popular datasets, [paperswithcode.com/datasets](https://paperswithcode.com/datasets) has curated licenses for some datasets. Their licensing guide can help determine the license of a dataset.
- For existing datasets that are re-packaged, both the original license and the license of the derived asset (if it has changed) should be provided.
- If this information is not available online, the authors are encouraged to reach out to the asset's creators.

### 13. **New assets**

Question: Are new assets introduced in the paper well documented and is the documentation provided alongside the assets?

Answer: [\[Yes\]](#)

Justification: We release two datasets under the CC-BY 4.0 licenses and code implementation under the MIT license. Datasets and code can be found in this anonymized URL.

Guidelines:

- The answer NA means that the paper does not release new assets.
- Researchers should communicate the details of the dataset/code/model as part of their submissions via structured templates. This includes details about training, license, limitations, etc.
- The paper should discuss whether and how consent was obtained from people whose asset is used.
- At submission time, remember to anonymize your assets (if applicable). You can either create an anonymized URL or include an anonymized zip file.

### 14. **Crowdsourcing and research with human subjects**

Question: For crowdsourcing experiments and research with human subjects, does the paper include the full text of instructions given to participants and screenshots, if applicable, as well as details about compensation (if any)?

Answer: [\[NA\]](#)

Justification: This paper does not involve any crowdsourcing nor research with human subjects.

Guidelines:

- The answer NA means that the paper does not involve crowdsourcing nor research with human subjects.
- Including this information in the supplemental material is fine, but if the main contribution of the paper involves human subjects, then as much detail as possible should be included in the main paper.
- According to the NeurIPS Code of Ethics, workers involved in data collection, curation, or other labor should be paid at least the minimum wage in the country of the data collector.

### 15. **Institutional review board (IRB) approvals or equivalent for research with human subjects**

Question: Does the paper describe potential risks incurred by study participants, whether such risks were disclosed to the subjects, and whether Institutional Review Board (IRB) approvals (or an equivalent approval/review based on the requirements of your country or institution) were obtained?

Answer: [\[NA\]](#)

Justification: This paper does not involve any crowdsourcing nor research with human subjects.

Guidelines:

- The answer NA means that the paper does not involve crowdsourcing nor research with human subjects.

- Depending on the country in which research is conducted, IRB approval (or equivalent) may be required for any human subjects research. If you obtained IRB approval, you should clearly state this in the paper.
- We recognize that the procedures for this may vary significantly between institutions and locations, and we expect authors to adhere to the NeurIPS Code of Ethics and the guidelines for their institution.
- For initial submissions, do not include any information that would break anonymity (if applicable), such as the institution conducting the review.

#### 16. **Declaration of LLM usage**

Question: Does the paper describe the usage of LLMs if it is an important, original, or non-standard component of the core methods in this research? Note that if the LLM is used only for writing, editing, or formatting purposes and does not impact the core methodology, scientific rigorousness, or originality of the research, declaration is not required.

Answer: [NA]

Justification: The core methodology of this paper does not involve LLMs as any important, original, nor non-standard components.

Guidelines:

- The answer NA means that the core method development in this research does not involve LLMs as any important, original, or non-standard components.
- Please refer to our LLM policy (<https://neurips.cc/Conferences/2025/LLM>) for what should or should not be described.

## A Related Work

### A.1 Nutrient Data

Ocean nutrient data can be broadly categorized into two types: real-world observations and simulation-based fields.

**Observed nutrient data.** Observed nutrient data are derived from in-situ measurements collected by research cruises, floats, and moored platforms. Among available sources, the *World Ocean Database* (WOD) has become the de facto standard for global nutrient observations, offering decades of quality-controlled profiles for key variables such as nitrate, phosphate, and silicate Mishonov et al. [2024]. Due to its wide adoption and comprehensive coverage, WOD is now routinely used in ocean biogeochemistry as the primary reference for real-world nutrient distribution. While highly valuable, these observations remain spatially sparse and unevenly distributed—especially in deep waters or remote regions—posing challenges for learning-based reconstruction.

**Simulated nutrient data.** Simulated nutrient data are not readily available in standardized form. Unlike temperature or salinity, there is no operational reanalysis product that provides global, high-resolution nutrient fields. As a result, researchers must manually generate simulation datasets by running ocean circulation models coupled with biogeochemical modules. Commonly used models include MOM6 Griffies et al. [2012], MITgcm Adcroft et al. [2018], and ROMS Shchepetkin and McWilliams [2005], each supporting flexible ecosystem components such as COBALT, NPZD, or Darwin. Although generating such simulations requires careful setup and tuning, they provide physically consistent and temporally continuous nutrient fields that serve as ideal testbeds for evaluating reconstruction algorithms under controlled conditions.

### A.2 Assimilation Methods

Given the sparsity and irregularity of observed nutrient data, traditional oceanographic reconstruction has long relied on data assimilation techniques to combine physical models with available measurements in a dynamically consistent manner.

**Classical Assimilation Methods.** Data assimilation refers to methods that integrate observations into dynamical models to estimate system states in a manner consistent with both empirical data and physical laws. Classical approaches include Optimal Interpolation (OI) Conkright et al. [2002], which statistically estimates missing values by weighting nearby observations under an assumed covariance structure; variational assimilation methods such as 3D-Var and 4D-Var Courtier et al. [1994], which adjust model inputs by minimizing observation-model misfits through cost function optimization; ensemble-based methods like the Ensemble Kalman Filter (EnKF) Nerger and Gregg [2008], which sequentially update states and quantify uncertainty; and Variational Inverse Models (VIM) Brasseur and Haus [1991], Belgacem et al. [2021], which reconstruct fields by minimizing misfit with regularization such as spatial smoothness. These methods are physically grounded and produce dynamically consistent reconstructions, but they are computationally expensive and depend heavily on model accuracy and proper specification of error statistics.

**Oceanographic Assimilation Methods.** In the ocean domain, these techniques have been implemented in several large-scale assimilation systems. Variational assimilation (4D-Var) underpins the Biogeochemical Southern Ocean State Estimate (B-SOSE) Verdy and Mazloff [2017] and the Regional Ocean Modeling System (ROMS) Shchepetkin and McWilliams [2005], both of which integrate physical and biogeochemical observations. Ensemble Kalman Filter methods have been adopted in MOM6 Griffies et al. [2012] for global ocean reanalysis and in the NASA Ocean Biogeochemical Model (NOBM) Rousseaux and Gregg [2012] to assimilate satellite chlorophyll and constrain nutrient fields via biological coupling. These ocean systems leverage physical coupling and multivariate dynamics for better reconstructions, but still face limitations due to observational sparsity, structural model biases, and high computational cost—particularly in complex biogeochemical regimes.

### A.3 Data-Driven Reconstruction Approach

Given the limitations of model-based assimilation in computational cost and flexibility, data-driven methods have become increasingly popular in ocean field reconstruction.

**Supervised Learning from Proxies.** Early approaches used machine learning models to reconstruct ocean biogeochemical fields from observable proxies (e.g., SST, chlorophyll), often trained on simulated or remote sensing data. Representative examples include CNN-based architectures and Earthformer Gao et al. [2022], a transformer designed for spatiotemporal Earth data. Tree-based ensemble models such as gcForest Zhong et al. [2025] have also been applied, achieving high accuracy in reconstructing surface  $p\text{CO}_2$  from satellite and reanalysis inputs. While these models can capture complex mappings, they often lack physical consistency and struggle to generalize in data-sparse regimes.

**Physics-Informed and Hybrid Models.** To address the limitations of purely data-driven models, recent approaches embed physical structure into neural architectures. This includes PINNs Raissi et al. [2017], which incorporate PDE constraints directly into the loss function; hybrid systems such as CLOINet Cutolo et al. [2024], which blend optimal interpolation with deep learning across clustered regimes; and 4DVarNet Beauchamp et al. [2023], which learns variational assimilation schemes end-to-end. Models like OxyGenerator Lu et al. [2024] further integrate graph structure and domain knowledge to reconstruct long-term ocean oxygen trends. These approaches improve physical plausibility and generalization but remain sensitive to constraint design and often require high computational cost.

**Foundation Models for Ocean Fields.** The latest developments introduce large-scale pretrained foundation models, such as Pritvi Schmude et al. [2024] and AtmoRep Lessig et al. [2023], which are trained across diverse ocean variables, resolutions, and modalities. These models aim for broad generalization, enabling flexible field reconstruction, prediction, or gap-filling from sparse inputs. While still emerging, such models represent a shift toward unified, scalable frameworks that integrate learning, inference, and physical priors across tasks. Despite recent progress, these methods often require large datasets, lack guaranteed physical consistency, and may generalize poorly in data-sparse or dynamic regions.

#### A.4 General AI Methods for Reconstruction and Inpainting

Beyond domain-specific architectures, recent advances in general-purpose AI have introduced new directions for reconstructing sparse geophysical fields.

**Deep Learning-based Image Inpainting.** Image inpainting models from computer vision reconstruct missing regions by learning spatial structure and semantics, and have been adapted to ocean fields by treating gridded data as images. Representative approaches include GAN-based models like CoModGAN Zhao et al. [2021] and EdgeConnect Nazeri et al. [2019], which synthesize realistic textures with structural continuity; transformer-based models like the Mask-Aware Transformer (MAT) Li et al. [2022], which capture long-range dependencies; and diffusion-based methods such as RePaint Lugmayr et al. [2022], which sample diverse completions via iterative denoising. These models excel at filling large, irregular gaps, but may lack physical consistency when applied to scientific variables. They are effective in capturing semantic structure but often require large datasets and ignore physical laws.

**Neural Operators.** Neural operators aim to learn mappings between function spaces, enabling the solution of entire families of partial differential equations (PDEs). Fourier Neural Operators (FNOs) Li et al. [2020] parameterize integral operators in Fourier space, achieving resolution-independent prediction in high-dimensional systems like turbulence. Mesh-based neural operators such as MeshGraphNets Pfaff et al. [2020] extend this idea to unstructured spatial domains using graph neural networks. These models generalize well across spatial configurations, but may require large simulation datasets and careful design to capture multi-scale dynamics. They offer strong generalization across spatial domains, but depend on high-quality simulations and may be hard to train stably.

**Implicit Neural Representations (INRs).** INRs extend the idea of neural operators by learning continuous, coordinate-based field representations from sparse data. Instead of gridded outputs, INRs directly map spatial or spatio-temporal coordinates to field values, allowing arbitrary-resolution reconstructions. Recent approaches Luo et al. [2024] combine INRs with variable separation techniques to model spatio-temporal structure from limited observations, and have demonstrated strong results in climate and sea surface temperature field recovery. INRs allow flexible, high-resolution reconstructions, but often require careful regularization and are computationally demanding.

## B Implementation Details of NUTS

### B.1 Architectural Details

The NUTS model integrates a robust initializer, a homogenized PDE solver, a refinement module and a source model.

**Robust Initializer.** At the beginning of the coarse module, a Fourier-based low-pass filter is applied to remove the high-frequency eddy flow, producing the mean flow. Specifically, we first transform the ocean flows to frequency domain using Fourier Fast Transform (FFT), and filter out 90% of the high-frequency data. The initializer takes the extracted mean flow, with nutrient observation and auxiliary variables as inputs, and partitions the input sequence into non-overlapping tubelets, flattening each tubelet into tokens of dimension  $D$ . These tokens are processed by 12 transformer layers, with each adopting spatiotemporal self-attention to capture long-range dependencies across space and time, producing coarse nutrient concentration at the initial frame  $\bar{\varphi}(\mathbf{x}_k, t_0)$ .

**Homogenized PDE Solver.** The evolution of  $\bar{\varphi}$  is governed by the following advection-diffusion equation with learned effective diffusivity:

$$\frac{\partial \bar{\varphi}}{\partial t} = -\nabla \cdot (\bar{\varphi} \bar{\mathbf{w}}^*) + \nabla \cdot (K \nabla \bar{\varphi}),$$

where  $\bar{\mathbf{w}}^*$  is the filtered mean flow and  $K(\mathbf{x})$  is a spatially varying effective diffusion coefficient generated by a neural hypernetwork. The divergence term  $\nabla \cdot (\bar{\varphi} \bar{\mathbf{w}}^*)$  is computed using a first-order upwind difference scheme, while the diffusion term is approximated using a second-order central difference Laplacian. The neural hypernetwork is a lightweight ResNet style convolutional network, which consists of 2 residual layers, each made of 2 convolutional blocks with GELU Hendrycks and Gimpel [2016] activation and batch normalization. We discretize the equation using the method of lines and evolve the system in time with an explicit scheme.

**Refinement Module.** To recover fine-scale variability, the refinement module operates independently at each frame. It receives as input the propagated coarse prediction, normalized eddy velocity, auxiliary variables, and sparse observations. These are divided into non-overlapping patches and embedded into tokens of  $D$  dimension, which are processed by 6 vision transformer blocks. The refinement module outputs the refined estimate  $\hat{\varphi}(\mathbf{x}, t)$ , capturing localized nutrient redistribution induced by mesoscale eddies.

**Source Model.** Finally, a lightweight ResNet style convolutional source model parameterizes the source correction term  $s$ . In our implementation, the source model shares the same architectural design as the neural hypernetwork. The final output is the summation of the refined estimate  $\hat{\varphi}$  and the source correction term  $\hat{\varphi}_{\text{final}} = \hat{\varphi} + s$ .

### B.2 Input and Output Details

The NUTS model accepts an input tensor of shape  $B \times T \times C \times H \times W$ , where  $B$  denotes the batch size,  $T$  represents the number of temporal frames,  $C$  indicates the number of input channels (comprising nutrient observations, auxiliary variables, and oceanic flow components), and  $H \times W$  corresponds to the spatial resolution of each frame. The model outputs a tensor of shape  $B \times 1 \times H \times W$ , representing the nutrient concentration at each spatial location for the initial time frame.

The coarse module processes the full spatiotemporal input sequence via a tubelet embedding approach. Specifically, the input tensor is partitioned into  $N = \frac{THW}{tpq}$  non-overlapping tubelets, each reshaped into a vector of size  $tpq$ . These vectors are subsequently projected into a latent space of dimension  $D$  via a linear transformation. The coarse module then estimates the coarse nutrient concentration at the initial frame, denoted  $\bar{\varphi}(\mathbf{x}_k, t_0) \in \mathbb{R}^{B \times 1 \times H \times W}$ . This initial estimate is further propagated across the subsequent  $T - 1$  frames using the homogenized PDE solver, which simulates nutrient transport dynamics over time.

The refinement module operates on a per-frame basis, using the coarse output in conjunction with additional auxiliary variables to construct a tensor of shape  $B \times C \times H \times W$ . This tensor is spatially partitioned into  $M = \frac{HW}{pq}$  tokens, each of size  $pq$ , which are then linearly projected into the same latent space of dimension  $D$ . The refinement module outputs a temporally resolved estimate of nutrient concentration, denoted by  $\hat{\varphi}(\mathbf{x}, t)$ .

Subsequently, a source model takes the refined concentration  $\hat{\varphi}(\mathbf{x}, t)$  as input and predicts a correction term  $s$ , referred to as the source term. The final output of the NUTS model is obtained by combining the refined concentration with the source term, yielding the corrected nutrient concentration:  $\hat{\varphi}_{\text{final}}(\mathbf{x}, t) = \hat{\varphi}(\mathbf{x}, t) + s$ .

## C Theoretical Analysis

This section presents the rigorous formulation of Theorem 1, originally introduced in Section 3.3, which establishes the accuracy and robustness of the NUTS model under high-amplitude mesoscale perturbations. We begin by introducing the multiscale assumptions underlying the velocity decomposition in oceanic flows, and then state the theorem with precise analytical conditions.

### C.1 Multiscale Velocity Decomposition and Assumptions

In geophysical fluid dynamics, ocean velocity fields exhibit a pronounced scale separation between slowly evolving basin-scale currents and rapidly fluctuating mesoscale eddies. This motivates the use of two-scale asymptotic expansions, a framework rigorously developed in the homogenization theory of advection–diffusion equations (cf. Bensoussan et al. [2011], Pavliotis and Stuart [2008], Majda and Kramer [1999]). Following this paradigm, we represent the ocean velocity field over a bounded Lipschitz domain  $\Omega \subset \mathbb{R}^2$  and time interval  $[0, T]$  by the multiscale expansion:

$$\mathbf{w}_\delta(\mathbf{x}, t) = \bar{\mathbf{w}}^*(\mathbf{x}, t) + \frac{1}{\varepsilon} \mathbf{v}^* \left( \mathbf{x}, t; \frac{\mathbf{x}}{\varepsilon}, \frac{t}{\varepsilon^2} \right) + \delta \left( \mathbf{x}, t; \frac{\mathbf{x}}{\varepsilon}, \frac{t}{\varepsilon^2} \right),$$

where:

- $\varepsilon \ll 1$  is the scale separation parameter distinguishing slow large-scale advection from fast mesoscale variability;
- $\bar{\mathbf{w}}^*(\mathbf{x}, t)$  is the large-scale mean velocity, which can be extracted using a Fourier low-pass filter as described in Section 3.2;
- $\mathbf{v}^*$  denotes the mesoscale eddy component, which oscillates on the fast spatial and temporal scales  $(\mathbf{y}, \tau) := (\mathbf{x}/\varepsilon, t/\varepsilon^2)$ ;
- $\delta$  represents an unresolved perturbation field that captures additional fine-scale variability.

We define the ground-truth (unperturbed) velocity field as:

$$\mathbf{w}^*(\mathbf{x}, t) = \bar{\mathbf{w}}^*(\mathbf{x}, t) + \frac{1}{\varepsilon} \mathbf{v}^* \left( \mathbf{x}, t; \frac{\mathbf{x}}{\varepsilon}, \frac{t}{\varepsilon^2} \right).$$

This decomposition captures the empirical observation that mesoscale eddies are energetically active yet contribute little to net transport at large scales Majda and Kramer [1999], Froyland et al. [2007]. The choice of parabolic temporal scaling ( $t/\varepsilon^2$ ) ensures that the rapid eddy dynamics interact with diffusion at leading order, consistent with the effective behavior of passive tracers in high Péclet number regimes (cf. Pavliotis and Stuart [2008], Rhines [1979]). This scaling is crucial to derive non-trivial homogenized limits and physically realistic coarse-scale closures.

**Assumption 1 (Periodicity and Mean-Zero Structure of Mesoscale Eddies).** *We assume that the eddy component  $\mathbf{v}^*(\mathbf{x}, t; \mathbf{y}, \tau)$  and perturbation  $\delta(\mathbf{x}, t; \mathbf{y}, \tau)$  are periodic in the fast variables  $(\mathbf{y}, \tau) \in [0, 1]^3 = Y$ , and satisfy the mean-zero conditions:*

$$\int_Y \mathbf{v}^*(\mathbf{x}, t; \mathbf{y}, \tau) d\mathbf{y} d\tau = 0, \quad \int_Y \delta(\mathbf{x}, t; \mathbf{y}, \tau) d\mathbf{y} d\tau = 0,$$

for all  $(\mathbf{x}, t) \in \Omega \times [0, T]$ .

**Remark.** This assumption reflects the physical fact that mesoscale eddies, while dynamically intense, primarily redistribute tracers locally and do not contribute to net long-range transport. These eddies are typically quasi-periodic, spatially bounded, and energetically constrained, exhibiting no systematic drift over averaging domains Majda and Kramer [1999], Sieck and Jacob [2016]. Mathematically, the periodic and mean-zero structure enables rigorous homogenization analysis, yielding an effective advection–diffusion equation where mesoscale effects are encoded through an enhanced diffusion tensor Bensoussan et al. [2011], Pavliotis and Stuart [2008]. This provides a principled basis for building stable and interpretable coarse-scale ocean models.

## C.2 Homogenized and Fine-Scale Transport Equations

The homogenized solver in NUTS predicts the coarse-scale nutrient field  $\bar{\varphi}(\mathbf{x}, t)$  using the filtered mean flow  $\bar{\mathbf{w}}^*$  via the equation:

$$\partial_t \bar{\varphi} + \bar{\mathbf{w}}^* \cdot \nabla \bar{\varphi} = \nabla \cdot (K(\mathbf{x}) \nabla \bar{\varphi}), \quad \bar{\varphi}(\mathbf{x}, 0) = \varphi_0(\mathbf{x}),$$

where  $K(\mathbf{x})$  is the effective diffusion tensor predicted by the hypernetwork module (see Equation (2), Section 3.2), and  $\varphi_0 \in H^2(\Omega)$  is the initial nutrient field. Recall  $\hat{\varphi} = \mathcal{R} \left[ \bar{\varphi}, \bar{\mathbf{w}}^*, \frac{\mathbf{w} - \bar{\mathbf{w}}^*}{\|\mathbf{w} - \bar{\mathbf{w}}^*\|_2}, \Phi, f \right]$  where  $\mathcal{R}$  is smooth functional. In contrast, the true nutrient field  $\varphi^*(\mathbf{x}, t)$  evolves according to the full multiscale advection–diffusion equation driven by the ground-truth velocity  $\mathbf{w}^*$ :

$$\partial_t \varphi^* + \mathbf{w}^* \cdot \nabla \varphi^* = \eta \nabla^2 \varphi^*, \quad \varphi^*(\mathbf{x}, 0) = \varphi_0(\mathbf{x}),$$

subject to homogeneous Neumann boundary conditions. Theorem 1 formally quantifies the discrepancy between  $\bar{\varphi}$  and  $\varphi^*$  under this multiscale setting, demonstrating that the homogenized model remains accurate and robust to perturbations of arbitrarily large amplitude in the  $L^\infty$  norm.

**Theorem 2** (Joint Accuracy and Robustness of NUTS). *Let  $\Omega \subset \mathbb{R}^2$  be a bounded Lipschitz domain, let  $T > 0$ , and fix  $0 < \varepsilon \ll 1$ . Assume the multiscale velocity decomposition*

$$\mathbf{w}_\delta(\mathbf{x}, t) = \bar{\mathbf{w}}^*(\mathbf{x}, t) + \frac{1}{\varepsilon} \mathbf{v}^*\left(\mathbf{x}, t; \frac{\mathbf{x}}{\varepsilon}, \frac{t}{\varepsilon^2}\right) + \delta\left(\mathbf{x}, t; \frac{\mathbf{x}}{\varepsilon}, \frac{t}{\varepsilon^2}\right),$$

where  $\mathbf{v}^*$  and  $\delta$  are  $Y$ –periodic in the fast variables and mean–zero in the sense of Assumption 1. Let  $\mathbf{w}^* = \bar{\mathbf{w}}^* + \mathbf{v}^*/\varepsilon$  denote the background flow and let  $\varphi^*$  solve

$$\partial_t \varphi^* + \mathbf{w}^* \cdot \nabla \varphi^* = \nabla^2 \varphi^*, \quad \varphi^*(\mathbf{x}, 0) = \varphi_0(\mathbf{x}),$$

with homogeneous Neumann boundary conditions on  $\partial\Omega$ . If  $\bar{\mathbf{w}}^* \in C^1([0, T]; C^1(\bar{\Omega})^2)$ ,  $\mathbf{v}^* \in C^1(\bar{\Omega} \times [0, T] \times Y)$  and  $K \in C^0(\bar{\Omega})$  is uniformly positive definite, and  $\varphi_0 \in H^1(\Omega)$ , then there exists a constant  $C > 0$ , independent of the perturbation amplitude  $\|\delta\|_{L^\infty}$ , such that

$$\min_{\mathcal{F}_0, \mathcal{R}} \|\hat{\varphi} - \varphi^*\|_{L^2([0, T] \times \Omega)} \leq C \varepsilon.$$

## C.3 Important Lemmas

We now state two technical lemmas that are essential to our homogenization analysis. The first establishes solvability conditions for the periodic fast-scale corrector problem, while the second provides an  $O(\varepsilon)$  estimate for the discrepancy between the fine-scale and coarse-scale solutions in  $L^2$ . These lemmas enable the construction of an accurate two-scale expansion and validate the convergence of our coarse-to-refined NUTS approximation.

The first lemma is adapted from Lemma 2.1 of the thesis by Grigorios Pavliotis [2002], which derives solvability conditions for cell problems in the presence of periodic velocity fields with temporal fluctuations. The second lemma is adapted from Theorem 4.7 in the work of Goudon and Poupaud [2005], which rigorously quantifies the  $L^2$  accuracy of homogenized approximations in the advection–diffusion setting under fast mean-zero fluctuations.

**Lemma 1** (Cell–problem solvability, Lemma 2.1 Pavliotis [2002]). *Let the fast variables be  $\mathbf{y} = \frac{\mathbf{x}}{\varepsilon}$ ,  $\tau = \frac{t}{\varepsilon^2}$ , and define the operator  $\mathcal{L}_0 := \partial_\tau + \mathbf{v}^*(\mathbf{x}, t; \mathbf{y}, \tau) \cdot \nabla_{\mathbf{y}} - \eta \nabla_{\mathbf{y}}^2$ , where  $\mathbf{v}^*$  is smooth, incompressible, and  $Y$ –periodic in  $(\mathbf{y}, \tau)$ , and  $\eta > 0$  denotes the microscopic molecular diffusivity. If  $g = g(\mathbf{x}, t; \mathbf{y}, \tau)$  is smooth,  $Y$ –periodic in  $(\mathbf{y}, \tau)$ , and has zero mean over the cell  $Y \times [0, 1]$ , then the cell problem  $\mathcal{L}_0 \chi = g$  in  $Y$  admits a unique (up to constant)  $Y$ –periodic solution  $\chi$ , fixed uniquely by imposing zero mean. Conversely, all periodic solutions of the homogeneous equation  $\mathcal{L}_0 \chi = 0$  are constant.*

**Lemma 2** (Parabolic estimate in  $L^2$ , Lemma 4.7 Goudon and Poupaud [2005]). *Fix a scale separation parameter  $\varepsilon \ll 1$ , and consider the advection–diffusion problem*

$$\partial_t \varphi^* + (\bar{\mathbf{w}}^*(\mathbf{x}, t) + \varepsilon^{-1} \mathbf{v}^*(\mathbf{x}, t; \frac{\mathbf{x}}{\varepsilon}, \frac{t}{\varepsilon^2})) \cdot \nabla \varphi^* - \eta \nabla^2 \varphi^* = 0 \quad \text{in } \mathbb{R}^d \times (0, \infty),$$

with initial data  $\varphi^*(\mathbf{x}, 0) = \varphi_0(\mathbf{x})$ . Assume that

$$\bar{\mathbf{w}}^* \in C^1([0, T] \times \bar{\Omega}), \quad \mathbf{v}^* \in C^1([0, T] \times \bar{\Omega} \times Y), \quad \nabla \cdot \bar{\mathbf{w}}^* = \nabla \cdot \mathbf{v}^* = 0, \quad \varphi_0 \in L^2(\mathbb{R}^d), \quad \eta > 0.$$



Let  $\bar{\varphi}$  solve the homogenized equation

$$\partial_t \bar{\varphi} + \bar{\mathbf{w}}^* \cdot \nabla \bar{\varphi} = \nabla \cdot (K(\mathbf{x}) \nabla \bar{\varphi}), \quad \bar{\varphi}(\mathbf{x}, 0) = \varphi_0(\mathbf{x}),$$

with effective diffusivity

$$K(\mathbf{x}, t) = \int_{Y \times [0,1]} (\chi^* \otimes \mathbf{v}^*)(\mathbf{x}, t; \mathbf{y}, \tau) d\mathbf{y} d\tau,$$

where  $\chi^*$  solves the cell problem  $\mathcal{L}_0 \chi = \mathbf{v}^*$  from Lemma 1. Then there exists a constant  $C = C(\|\varphi_0\|_{L^2}, V_0)$ , independent of  $\varepsilon$ , such that

$$\|\varphi^* - \bar{\varphi}\|_{L^\infty((0,t_0);L^2(\mathbb{R}^d))} \leq C\varepsilon.$$

These lemmas provide the analytical foundation for Theorem 2, ensuring that the error incurred by the NUTS predictor under homogenized dynamics remains uniformly controlled as  $\varepsilon \rightarrow 0$ .

#### C.4 Proof of Theorem 2

*Proof.* The argument proceeds in three steps. Throughout,  $\varphi^*$  denotes the exact fine-scale solution,  $\bar{\varphi}$  the homogenized (coarse) solution generated by the NUTS solver, and  $\hat{\varphi}$  an arbitrary prediction in the hypothesis class  $\mathcal{H} := \{\mathcal{R}[\bar{\varphi}, \bar{\mathbf{w}}^*, (\mathbf{w} - \bar{\mathbf{w}}^*)/\|\mathbf{w} - \bar{\mathbf{w}}^*\|_2, \Phi, f]\}$ .

We first show the existence of the corrector and effective tensor. By Lemma 1 (adapted from Pavliotis [2002]) there exists a unique periodic corrector  $\chi = \chi(\mathbf{x}, t; \mathbf{y}, \tau)$  solving

$$\mathcal{L}_0 \chi = \mathbf{v}^*(\mathbf{x}, t; \mathbf{y}, \tau) \cdot \nabla_{\mathbf{y}}, \quad \int_{Y \times (0,1)} \chi d\mathbf{y} d\tau = 0,$$

with  $\mathcal{L}_0$  as in Lemma 1. This corrector yields the *effective diffusion tensor*

$$K(\mathbf{x}, t) = \int_{Y \times (0,1)} (\chi \otimes \mathbf{v}^*)(\mathbf{x}, t; \mathbf{y}, \tau) d\mathbf{y} d\tau,$$

where  $K \in C^0(\bar{\Omega})^{2 \times 2}$ ,  $K$  uniformly positive definite. Because the hypernetwork in NUTS is assumed expressive enough to output any  $K \in C^0$ , we can choose its weights so that the coarse module solves

$$\partial_t \bar{\varphi} + \bar{\mathbf{w}}^* \cdot \nabla \bar{\varphi} = \nabla \cdot (K \nabla \bar{\varphi}), \quad \bar{\varphi}(\mathbf{x}, 0) = \varphi_0(\mathbf{x}), \quad (3)$$

with homogeneous Neumann boundary conditions. Standard parabolic theory gives  $\bar{\varphi} \in C([0, T]; H^2(\Omega))$ .

Next, we characterize the  $L^2$  proximity between fine and coarse solutions. Lemma 2 (adapted from Goudon–Poupaud [2005]) applies to (3) with forcing  $F \equiv 0$ ,  $\alpha = -1$  and  $\gamma = 2$ , and yields

$$\|\varphi^* - \bar{\varphi}\|_{L^\infty((0,T);L^2(\Omega))} \leq C_1 \varepsilon, \quad C_1 = C_1(\|\varphi_0\|_{L^2}, V_0), \quad (4)$$

where  $V_0 := \max_{\mathbf{x}, t} |\bar{\mathbf{w}}^*|$ . Because  $\mathbf{v}^*$  and the perturbation  $\delta$  are mean-zero in the fast variables, the constant  $C_1$  is independent of  $\|\delta\|_{L^\infty}$ .

We conclude the proof by the construction of a candidate predictor and optimality. Define the *candidate prediction*

$$\tilde{\varphi} := \mathcal{R}[\bar{\varphi}, \bar{\mathbf{w}}^*, (\mathbf{w} - \bar{\mathbf{w}}^*)/\|\mathbf{w} - \bar{\mathbf{w}}^*\|_2, \Phi, f] \quad \text{with } \mathcal{R} \equiv \text{Id},$$

i.e. we choose the refinement block to be the identity map. Because  $\tilde{\varphi} = \bar{\varphi}$ , estimate (4) gives

$$\|\tilde{\varphi} - \varphi^*\|_{L^2([0,T] \times \Omega)} \leq C_1 \varepsilon.$$

The minimizer  $\hat{\varphi}$  of any training objective over  $\mathcal{H}$  (in particular, the one used in NUTS) satisfies

$$\|\hat{\varphi} - \varphi^*\|_{L^2} \leq \|\tilde{\varphi} - \varphi^*\|_{L^2} \leq C_1 \varepsilon.$$

Setting  $C := C_1$  completes the proof of Theorem 2.  $\square$

## D Experiment Details

### D.1 Datasets

**World Ocean Database (WOD) Mishonov et al. [2024]** is a comprehensive global database that provides in situ oceanographic data spanning more than 250 years, from 1772 to the present. It compiles diverse data from various sources, including research vessels, autonomous platforms, and international collaborations. The database encompasses measurements of temperature, salinity, nutrients and other oceanographic variables, organized in profiles and casts. We use nitrate and phosphate observations from WOD released in 2023<sup>†</sup>, with a temporal coverage from January 1959 to December 2022.

**MOM6-COBALT2 Griffies et al. [2012] (under LGPLv3 license)**<sup>‡</sup> is an advanced regional ocean model developed by the Geophysical Fluid Dynamics Laboratory (GFDL) of the National Oceanic and Atmospheric Administration (NOAA). It integrates the Modular Ocean Model version 6 (MOM6) with the Carbon, Ocean Biogeochemistry, and Lower Trophics version 2 (COBALT2) biogeochemical model to simulate ocean dynamics and biogeochemical processes at high spatial resolutions. In this paper, the MOM6-COBALT2 system is used to generate oceanographic data spanning from January 1959 to December 2022, including variables such as temperature, salinity, velocities, nitrate, and phosphate concentrations. The model operates at a spatial resolution of  $0.5^\circ \times 0.5^\circ$ , with daily and monthly temporal resolutions used for the daily and monthly average reconstruction tasks, respectively.

**MOM6 Data Generation Details.** The Geophysical Fluid Dynamics Laboratory (GFDL) global ocean/sea ice model configuration utilized in this study is based on the Modular Ocean Model version 6 (MOM6) coupled with the Sea Ice Simulator version 2 (SIS2). This model setup represents the fourth generation of GFDL’s ocean-ice models, known as OM4, which serves as the ocean and sea ice component of the GFDL climate and Earth system models (CM4 and ESM4) contributing to the Coupled Model Intercomparison Project (CMIP6) and Ocean Model Intercomparison Project (OMIP6) Adcroft et al. [2019]. The specific version applied in our simulations is OM4P5, characterized by a horizontal resolution of  $0.5^\circ$  with eddy parameterization. Vertically, the model employs 75 hybrid isopycnal- $z^*$  coordinates, which consist of a  $z^*$  coordinate near the surface (approximating 2 m thick layers in the upper 20 m within the tropical Pacific Ocean) and a modified potential density coordinate for deeper layers Adcroft et al. [2019]. Notably, sea surface temperature (SST) and salinity (SSS) relaxations were disabled throughout the simulation. For biogeochemical processes, the ocean/sea ice model is coupled with the Carbon Ocean Biogeochemistry and Lower Trophics version 2 (COBALT v2) module, which incorporates 33 state variables including essential nutrients (nitrate, phosphate, and iron), silicate, three phytoplankton groups, three zooplankton groups, three dissolved organic carbon pools, one particulate detritus pool, oxygen, and the carbonate system Stock et al. [2014]. Detailed descriptions of planktonic food web dynamics and large-scale carbon flux assessments, such as net primary production and zooplankton productivity, are provided in Stock et al. [2014]. The model is forced with the Japanese 55-year atmospheric reanalysis dataset (JRA55-do) version 1.3, which provides atmospheric forcing at a spatial resolution of 55 km and a temporal resolution of 3 hours Tsujino et al. [2018]. Additionally, atmospheric  $p\text{CO}_2$  data are sourced from the Earth System Research Laboratory Joos and Spahni [2008], applying global averages for the period 1959–1978 and latitudinally resolved values for 1979–2018. Initialization of key oceanographic variables was based on the World Ocean Atlas 2013 for temperature, salinity, nutrients (nitrate, phosphate, and silicate), and oxygen Garcia et al. [2013a,b], Locarnini et al. [2013], Zweng et al. [2013]. For biogeochemical tracers, dissolved inorganic carbon (DIC) and alkalinity (Alk) were initialized using the GLODAP v2 dataset Olsen et al. [2016]. Furthermore, the initial DIC distribution was adjusted to reflect 1959 levels by correcting for the accumulation of anthropogenic carbon, based on ocean anthropogenic carbon content estimates Khatiwala et al. [2009]. Other tracers within the COBALT module, such as ammonium and calcium carbonate, were initialized from a preindustrial GFDL-ESM2M-COBALT simulation Stock et al. [2014]. The model underwent an 81-year spin-up by repeatedly forcing it with the 1959 atmospheric conditions from JRA55-do v1.3. This prolonged spin-up allowed the system to achieve a near-equilibrium state between atmospheric  $p\text{CO}_2$  and surface ocean  $p\text{CO}_2$ , with the global air-sea  $\text{CO}_2$  flux drifting less than  $0.004 \text{ PgC/yr}$ .

<sup>†</sup><https://www.ncei.noaa.gov/access/world-ocean-database-select/dbsearch.html>

<sup>‡</sup><https://github.com/NOAA-GFDL/MOM6-examples>

over the final decade of the spin-up period. Following this equilibrium, the hindcast simulation was conducted for the years 1959 to 2018, providing a robust baseline for subsequent analyses.

## D.2 Metrics

**Normalized RMSE** quantifies the average error between the reconstructed results and the ground-truth values. A lower NRMSE indicates better performance. In order to obtain NRMSE, the latitude-weighted RMSE is first calculated as:

$$\text{RMSE} = \frac{1}{N} \sum_{t=1}^N \sqrt{\frac{1}{HW} \sum_{h=1}^H \sum_{w=1}^W \alpha(h)(y_{thw} - u_{thw})^2},$$

where  $N$  is the total number of time points,  $H$  is the number of latitude grid points, and  $W$  is the number of longitude grid points, forming a grid over the Earth's surface. The index  $t$  refers to a specific time point, while  $h$  and  $w$  represent specific latitude and longitude indices, respectively. The observed value at a given time  $t$ , latitude  $h$ , and longitude  $w$  is denoted by  $y_{thw}$ , and the corresponding reconstructed value is  $u_{thw}$ . The term  $\alpha(h)$  is the latitude weight, which accounts for the curvature of the Earth, and is defined as  $\alpha(h) = \cos(h) / (\frac{1}{H} \sum_{h'} \cos(h'))$ . The expression  $(y_{thw} - u_{thw})^2$  represents the squared difference between the observed and reconstructed values at each grid point. The summations over  $t$ ,  $h$ , and  $w$  aggregate the errors over all dimensions. The NRMSE is calculated by normalizing RMSE with the mean of the ground-truth values:

$$\text{NRMSE} = \frac{\text{RMSE}}{\frac{1}{NHW} \sum_{t=1}^N \sum_{h=1}^H \sum_{w=1}^W y_{thw}}.$$

## D.3 Implementation Details

According to the results in Table 4b, we set the cutoff ratio to 0.1 when applying FFT, preserving the low-frequency components within 10% of the center of the frequency spectrum. We set the interval length to 4, as the results in Table 6f indicate an interval length of 4 offers the best performance. We train the model for 500 epochs by default. We employ the AdamW optimizer Loshchilov [2017] (momentum betas 0.9 and 0.999) and adopt cosine annealing for learning rate scheduling. We identify an optimal combination of learning rate and weight decay through grid search within the sets  $\{0.1, 0.3, 0.5, 0.8, 1\} \times 10^{-3}$  and  $\{0.1, 0.5, 1, 2\} \times 10^{-3}$ , respectively. We find that the best learning rate and weight decay for the MOM6 dataset are  $0.3 \times 10^{-3}$  and  $2 \times 10^{-3}$ , while we set these to  $0.5 \times 10^{-3}$  and  $0.5 \times 10^{-3}$  for the WOD dataset. The model is trained for 500 epochs by default. We conducted all experiments on two NVIDIA RTX 6000 Ada GPUs and set the batch size per GPU to 4 on both datasets.

## D.4 Sampling Strategies

**Simulation Dataset.** Based on the complete nutrient concentration map generated from simulations, we simulate the ship-based surveys by sampling data points located along the trajectory of real observations depicted in Figure 6. Moreover, additional data points are sampled adjacent to the trajectory when the sampling ratio exceeds the spatial coverage of the trajectory, ensuring consistency with the ship-based observational patterns.

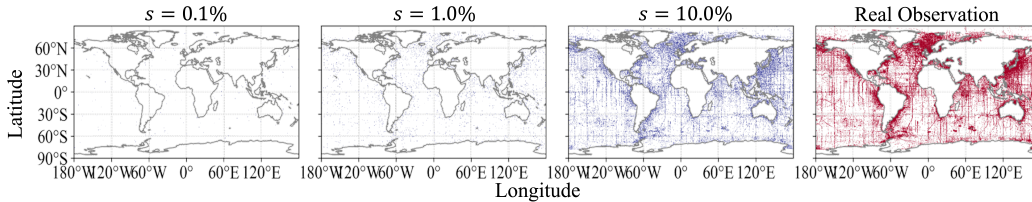

Figure 6: Illustration of sampled data points and real observations. Blue dots represent sampled locations. Red dots represent real observations. Better viewed when zoomed in.

**Real Observations.** We partition the real observations by randomly selecting 75% of data points for training, while reserving the remaining 25% for testing. Specifically, at each timestep, we first identify all observed locations and randomly sample data points from a uniform distribution over the interval  $\mathcal{U}[0, 1]$  to select training subset.

## D.5 Hyperparameter setting.

**NUTS<sup>†</sup>**. We configure the hyper-parameters for NUTS as described in Table 7. Implementation details are provided in Appendix D.3.

Table 7: Hyper-parameters used for NUTS.

| Hyper-param.    | Meaning                                                                         | Value  |
|-----------------|---------------------------------------------------------------------------------|--------|
| $t$             | Tubelet size in the initializer                                                 | 2      |
| $p, q$          | Patch size in the transformer layers                                            | 18, 36 |
| $D$             | Embedding dimension                                                             | 768    |
| # Coarse layer  | Number of transformer layers in the initializer                                 | 12     |
| # Refine layer  | Number of transformer layers in the refinement module                           | 6      |
| # Heads         | Number of attention heads in each transformer layer                             | 16     |
| MLP dimension   | Hidden dimension of the MLP layers                                              | 2048   |
| # Blocks        | Number of convolutional blocks in the source/diffusion network                  | [2, 2] |
| Base channels   | Number of channels in the first convolutional block of source/diffusion network | 16     |
| Dropout(coarse) | Dropout rate in data-driven initializer                                         | 0.0    |
| Dropout(refine) | Dropout rate in refinement module                                               | 0.1    |

**4D-Varnet Beauchamp et al. [2023] (under CeCILL-C license)<sup>†</sup>**. We configure the hyper-parameters for 4D-Varnet as described in Table 8. We train the model for 100 epochs by default and employ the AdamW optimizer with the momentum betas set to 0.9 and 0.999 and adopt cosine scheduler for learning rate scheduling. We set the learning rate and weight decay to  $1 \times 10^{-3}$  and  $1 \times 10^{-5}$  on both datasets.

Table 8: Hyper-parameters used for 4D-Varnet.

| Hyper-param.     | Meaning                             | Value |
|------------------|-------------------------------------|-------|
| Shape data       | Input channels of the model         | 6     |
| $D$              | Hidden dimension for bilinear units | 25    |
| # Blocks         | Number of residual bilinear blocks  | 1     |
| Half kernel size | Convolution half-kernel sizes       | 3     |
| Subsample stride | Subsampling stride                  | 4     |
| Dropout          | Dropout rate applied in encoder     | 0.0   |

Table 9: Hyper-parameters used for Marble.

| Hyper-param.         | Meaning                                                            | Value |
|----------------------|--------------------------------------------------------------------|-------|
| Grid size            | Spatial resolution of modulation grid                              | 8     |
| Grid base            | Number of basis functions per grid cell                            | 32    |
| Hidden dimension     | Dimension of hidden layers in Siren Sitzmann et al. [2020] network | 64    |
| # Layer              | Number of layers in Siren Sitzmann et al. [2020] network           | 6     |
| Latent dimension     | Dimension of latent vector                                         | 32    |
| Modulation dimension | Hidden dimension of modulation network                             | 128   |

**FNO Li et al. [2020] (under MIT license)<sup>†</sup>**. We configure the hyper-parameters for FNO as described in Table 10. The model is trained for 500 epochs by default using the AdamW optimizer, with momentum betas set to 0.9 and 0.999. We use a learning rate of  $3 \times 10^{-4}$  and a weight decay of  $5 \times 10^{-4}$  for both datasets. Additionally, we adopt a cosine annealing schedule to adjust the learning rate during training.

Table 10: Hyper-parameters used for FNO.

| Hyper-param.        | Meaning                                    | Value |
|---------------------|--------------------------------------------|-------|
| # Modes             | Number of modes to keep in Fourier layer   | 16    |
| In Channels         | Number of channels in input function       | 6     |
| Out Channels        | Number of channels in output function      | 1     |
| Hidden Channels     | Width of FNO                               | 64    |
| Projection Channels | Number of channels in the projection block | 256   |
| Lifting Channels    | Number of channels in the lifting block    | 256   |
| # Layers            | Number of Fourier layers                   | 4     |

**U-Net Ronneberger et al. [2015] (under GPL-3.0 license)<sup>†</sup>**. We configure the hyperparameters as specified in Table 11. The model is trained for 500 epochs by default using the AdamW optimizer with momentum betas set to 0.9 and 0.999. A learning rate of  $1 \times 10^{-5}$  and a weight decay of  $1 \times 10^{-5}$  are consistently applied across both datasets.

Table 11: Hyper-parameters used for U-Net.

| Hyper-param.  | Meaning                                       | Value |
|---------------|-----------------------------------------------|-------|
| Kernel size   | Kernel size of encoder/decoder block          | 3     |
| Stride        | Stride of encoder/decoder block               | 1     |
| Padding size  | Padding size of encoder/decoder block         | 1     |
| Base channels | Number of channels in the first encoder block | 64    |
| # Blocks      | Number of encoder/decoder blocks              | 4     |

<sup>†</sup><https://github.com/Leamonz/NUTS>

<sup>†</sup><https://zenodo.org/records/8048541>

<sup>†</sup><https://github.com/LeapLabTHU/GridMix>

<sup>†</sup><https://github.com/neuraloperator/neuraloperator>

<sup>†</sup><https://github.com/milesial/Pytorch-UNet>

To dynamically adjust the learning rate throughout training, we employ a cosine annealing schedule.

**Vision Transformer (ViT) Dosovitskiy et al. [2020].** We conduct experiments with ViT using our implementation. The hyper-parameters are configured as outlined in Table 12. By default, the model is trained for 500 epochs with the AdamW optimizer, employing momentum betas of 0.9 and 0.999. A learning rate of  $3 \times 10^{-4}$  and a weight decay of  $5 \times 10^{-4}$  are applied across both datasets. We utilize a cosine annealing schedule to adjust the learning rate during training.

**AtmoRep Lessig et al. [2023] (under MIT license)<sup>†</sup>.** We configure the hyper-parameters for AtmoRep as described in Table 13. We load pre-trained weights from model ID 4nvwbetz. By default, we finetune all pretrained weights for 100 epochs with the AdamW optimizer, employing momentum betas of 0.9 and 0.999. A learning rate of  $1 \times 10^{-4}$  and a weight decay of  $1 \times 10^{-5}$  are applied across both datasets. We utilize a cosine annealing schedule to adjust the learning rate during training.

**Prithvi Schumde et al. [2024] (under MIT license)<sup>†</sup>.** We configure the hyper-parameters for Prithvi as described in Table 14. We load official pretrained weights<sup>†</sup> and finetune the last decoder layer for 100 epochs. We employ AdamW optimizer, with momentum betas set to 0.9 and 0.999. We set learning rate and weight decay to  $1 \times 10^{-4}$  and  $1 \times 10^{-5}$ , respectively. Cosine annealing is adopted for learning rate scheduling.

## D.6 Model efficiency.

We evaluate the computational efficiency of our NUTS against other data-driven baselines on two NVIDIA RTX 6000 Ada GPUs under a total batch size of 8. Note that AtmoRep and Prithvi are finetuned with bf16 precision. Table 15 displays the model parameters, training time (time per epoch), training memory (maximum GPU VRAM usage during training), inference time (time for processing the test set) and inference memory (maximum GPU VRAM usage during inference). Our NUTS achieves lower NRMSE compared to other baselines, while showing satisfactory efficiency.

Table 15: Parameter, efficiency and Phosphate (sampling ratio=0.1%) reconstruction performance comparison of different models on the WOD (Daily) dataset.

| Model       | Params        | Time <sub>Train</sub><br>(s/epoch) | VRAM <sub>Train</sub><br>(GB) | Time <sub>Infer</sub><br>(s) | VRAM <sub>Infer</sub><br>(GB) | NRMSE                             |
|-------------|---------------|------------------------------------|-------------------------------|------------------------------|-------------------------------|-----------------------------------|
| 4D-VarNet   | 0.3M          | 94                                 | 6.8                           | 46                           | 3.0                           | 0.187 $\pm$ 0.008                 |
| Marble      | 0.6M          | 23                                 | 2.8                           | 7                            | 0.7                           | 0.363 $\pm$ 0.058                 |
| FNO         | 4.8M          | 26                                 | 14.2                          | 10                           | 4.5                           | 0.244 $\pm$ 0.015                 |
| U-Net       | 31.0M         | 16                                 | 6.4                           | 7                            | 2.9                           | 0.174 $\pm$ 0.012                 |
| ViT         | 77.7M         | 62                                 | 21.7                          | 20                           | 4.0                           | 0.263 $\pm$ 0.034                 |
| AtmoRep     | 0.7B          | 87                                 | 15.4                          | 58                           | 10.9                          | 0.206 $\pm$ 0.013                 |
| Prithvi     | 2.3B          | 950                                | 26.1                          | 112                          | 18.4                          | 0.222 $\pm$ 0.042                 |
| <b>NUTS</b> | <b>125.6M</b> | <b>92</b>                          | <b>31.0</b>                   | <b>58</b>                    | <b>8.7</b>                    | <b>0.035<math>\pm</math>0.002</b> |

<sup>†</sup><https://github.com/clessig/atmorep>

<sup>†</sup><https://github.com/NASA-IMPACT/Prithvi-WxC>

<sup>†</sup><https://huggingface.co/Prithvi-WxC/prithvi.wxc.2300m.v1>

Table 12: Hyper-parameters used for ViT.

| Hyper-param.  | Meaning                                | Value |
|---------------|----------------------------------------|-------|
| $p, q$        | Patch size                             | 9,18  |
| D             | Embedding dimension                    | 768   |
| # Blocks      | Number of ViT blocks                   | 12    |
| # Heads       | Number of attention heads              | 16    |
| MLP dimension | The hidden dimension of the MLP layers | 2048  |
| Dropout       | Dropout rate                           | 0.1   |

Table 13: Hyper-parameters used for AtmoRep.

| Hyper-param.    | Meaning                                                             | Value |
|-----------------|---------------------------------------------------------------------|-------|
| D               | Embedding Dimension                                                 | 2048  |
| # Encoder layer | Number of transformer layers in the encoder                         | 10    |
| # Encoder heads | Number of attention heads in the encoder                            | 16    |
| # Decoder layer | Number of transformer layers in the decoder                         | 10    |
| # Decoder heads | Number of attention heads in the decoder                            | 16    |
| # Tail nets     | Number of networks in Tail Ensemble                                 | 16    |
| # Tail layer    | Number of layers per network in Tail Ensemble (0 represents linear) | 0     |

Table 14: Hyper-parameters used for Prithvi.

| Hyper-param.    | Meaning                                             | Value  |
|-----------------|-----------------------------------------------------|--------|
| $p, q$          | Patch size                                          | 2, 2   |
| D               | Embedding Dimension                                 | 2560   |
| # Encoder layer | Number of transformer layers in the encoder         | 25     |
| # Decoder layer | Number of transformer layers in the decoder         | 5      |
| # Heads         | Number of attention heads in each transformer layer | 16     |
| MLP dimension   | Hidden dimension of the MLP layers                  | 10240  |
| Window size     | Window size of attention layers                     | 30, 32 |
| Drop path       | For stochastic depth Huang et al. [2016]            | 0.0    |
| Dropout         | Dropout rate                                        | 0.0    |

Table 16: **Ablation Study (NRMSE ↓).** (a) Comparison of spatial resolution; (b) Evaluation of temporal resolution; (c) Comparison of conservation loss weight coefficient. Unless otherwise specified, the target nutrient is nitrate, the patch size is  $18 \times 36$ , the temporal resolution is 1-day and 1-month on MOM6 (Daily) and MOM6 (Monthly) dataset respectively, and  $\lambda$  is set to  $0.1 \times 10^{-3}$ .

| (a) Spatial Resolution. |              |              | (b) Temporal Resolution. |              |              | (c) Conservation Loss Coefficient $\lambda$ . |              |              |
|-------------------------|--------------|--------------|--------------------------|--------------|--------------|-----------------------------------------------|--------------|--------------|
| Patch                   | Daily        | Monthly      | Res.                     | Daily        | Monthly      | $\lambda(\times 10^{-3})$                     | Daily        | Monthly      |
| $9 \times 18$           | 0.172        | 0.253        | 1                        | <b>0.136</b> | <b>0.151</b> | 10                                            | 0.185        | 0.197        |
| $18 \times 36$          | <b>0.136</b> | <b>0.151</b> | 2                        | 0.211        | 0.210        | 1                                             | 0.181        | 0.192        |
| $20 \times 20$          | 0.166        | 0.212        | 3                        | 0.230        | 0.215        | 0.1                                           | <b>0.136</b> | <b>0.151</b> |
| $36 \times 72$          | 0.188        | 0.194        | 4                        | 0.231        | 0.231        | 0.01                                          | 0.187        | 0.208        |

## E Additional Experiments Results

### E.1 Additional Ablation Study.

We additionally evaluate the impact of spatial and temporal resolution, as well as the conservation loss weight coefficient. All ablation results in this section use nitrate as the target variable. **• Spatial Resolution.** Moderate patch size improves model performance as shown in Table 16a. Smaller patches enable fine-grained spatial learning but increase computational cost, while larger patches miss local features. In the context of oceanic nutrient reconstruction, small patch size may result in a substantial proportion of patches overlapping with land areas, which lack valid observational data. In practice, we adopt a patch size of  $18 \times 36$  as a balanced setting for our model. **• Temporal Resolution.** Higher temporal resolution generally leads to better reconstruction performance. As shown in Table 16b, a 1-day resolution yields the lowest NRMSE on the MOM6 (Daily) dataset, while coarser temporal aggregation degrades accuracy. This is because finer time steps better capture dynamic nutrient variations and temporal patterns. **• Conservation Loss Weight Coefficient.** We evaluate the conservation loss weight  $\lambda$  over the range  $\{10, 1, 0.1, 0.01\} \times 10^{-3}$  as shown in Table 16c, and find that  $\lambda = 0.1 \times 10^{-3}$  gives the best performance. This value strikes a balance by enforcing mass conservation without overly dominating the overall loss. Larger values of  $\lambda$  hinders reconstruction accuracy, while smaller values make the conservation effect negligible.

### E.2 Effect of Conservation Loss on Nutrient Mass.

We analyze how NUTS preserves the mass-conservation property by evaluating the time-integrated deviation of the conserved quantity. Specifically, we compute the integral  $I = \int_{t_0}^T \|M(\hat{\varphi}(\mathbf{x}, \tau)) - M(\hat{\varphi}(\mathbf{x}, t_0))\|_2^2 d\tau$ , which quantifies the cumulative deviation from mass conservation over time. As illustrated in Figure 7, the value of  $I$  remains close to zero when the conservation loss is applied. This indicates that the model maintains stable total nutrient mass over time, effectively enforcing the physical constraint. In contrast, models without this loss exhibit noticeable temporal drift, highlighting the importance of incorporating conservation to preserve physically plausible dynamics.

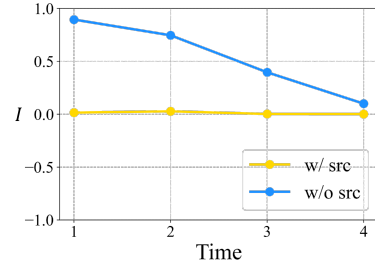

Figure 7: Validity of mass conservation.

### E.3 Analysis on the Source Module

To quantitatively evaluate its long-term effect, we added an additional analysis during the rebuttal phase: we compute the monthly variation rate of total nutrient mass, defined as the ratio of each month’s total mass to that of January in the same year, across four distinct years. As shown in Table 8, the refinement module maintains variation rates within  $\pm 0.04\%$ , adhering to the mass conservation constraint. Moreover, by introducing the source module, NUTS closely follows the ground-truth (G-T) variation trends. Since the final output of NUTS is defined as the sum of the learned source contribution and the refinement output, this result highlights the source module’s ability to capture seasonally varying source–sink dynamics and maintain physically consistent nutrient cycling over time. Experiments are conducted on the Monthly dataset with nitrate as the target nutrient.

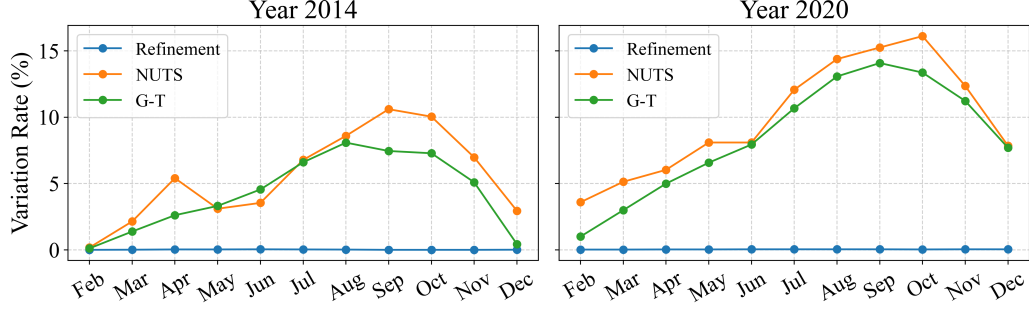

Figure 8: Monthly variation rates (%) of total nutrient mass from Refinement Module, NUTS and ground-truth (G-T) across two years (2014 & 2020). The variation rate is defined as the ratio of each month’s total nutrient mass to that of January within the same year.

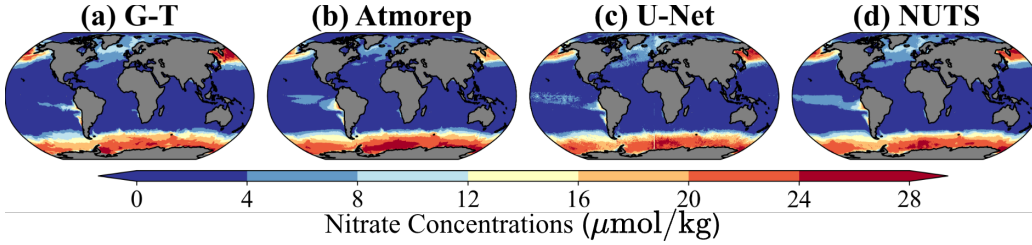

Figure 9: Qualitative comparison of nitrate reconstruction results from different models. (a) Ground-truth nitrate concentrations; (b) Output of Atmorep; (c) Output of U-Net; (d) Output of our NUTS.

#### E.4 Qualitative Comparison

We plot in Figure 9 the reconstruction output of Atmorep, U-Net, NUTS, as well as the ground-truth (G-T) for direct comparison. As seen in the figure, nutrient concentrations exhibit greater variability in the North Pacific and the Southern Ocean. In these regions, NUTS better captures the distribution of nutrient concentrations than other baselines, showcasing its ability to capture fine-scale structure while being robust to instabilities caused by the eddy flow.

## F Broader Impact

To demonstrate the broader applicability of our model beyond nutrient reconstruction, we evaluate its ability to reconstruct other ocean variables governed by the advection–diffusion equation, including temperature and salinity. Using both the daily and monthly MOM6 datasets, we formulate the task similarly to nutrient reconstruction: the model reconstructs the full field from sparse ship-based observations, the velocity field, and auxiliary variables. For consistency, we adopt the same sampling strategy described in Appendix D.4, randomly selecting 0.1% of spatial locations as observations.

Table 17: RMSE ( $\downarrow$ ) and ACC ( $\uparrow$ ) comparison of different models for reconstructing three atmospheric variables. \* indicates spatio-temporal reconstruction models, others are static reconstruction models.

| Methods          | MOM6         |              | WOD          |              |
|------------------|--------------|--------------|--------------|--------------|
|                  | Temp.        | Sal.         | Temp.        | Sal.         |
| U-Net            | 0.148        | 0.021        | 0.111        | 0.009        |
| ViT              | 0.225        | 0.023        | 0.143        | 0.017        |
| <b>NUTS</b>      | <b>0.129</b> | <b>0.017</b> | <b>0.084</b> | <b>0.008</b> |
| <b>Promotion</b> | <b>12.8%</b> | <b>19.0%</b> | <b>24.3%</b> | <b>11.1%</b> |

Table 17 summarizes the results. NUTS outperforms other baselines across both temperature and salinity reconstructions, indicating that its physics-informed coarse-to-refine architecture generalizes well across different tracer variables. These findings highlight the versatility and robustness of NUTS, suggesting its potential to serve as a general-purpose framework for reconstructing diverse environmental variables constrained by advection–diffusion dynamics. This broader applicability positions NUTS as a valuable tool for Earth system modeling and environmental data recovery in domains with sparse observations.

## **G Limitations**

A limitation of the NUTS model is that it integrates a homogenized PDE solver to approximate the advection-diffusion dynamics, employing a first-order upwind scheme for advection and a second-order central difference scheme for diffusion. While this discretization strategy offers computational simplicity, it may hinder the model training process or introduce numerical instabilities.

Furthermore, the current design of the NUTS model restricts its application to the reconstruction of sea surface nutrient concentrations, making it incapable of capturing the full three-dimensional structure of oceanic nutrient concentrations, which is an essential component for advancing our understanding of biogeochemical processes in the marine environment.

Finally, the NUTS model is fundamentally designed to conduct spatio-temporal reconstruction instead of long-term forecasting. Forecasting aims to extrapolate future states, often benefiting from longer rollouts, whereas reconstruction targets missing data within a fixed historical window. Although NUTS is limited to reconstruction, extending NUTS to forecasting presents a promising avenue for future research.
